# Supplementary material for: Transcriptome profiling of hiPSC-derived LSECs with nanoCAGE
Source: Royal Society of Chemistry journal article supplement (doi:10.1039/c9mo00135b), 2020-01-10
Supplement: c9mo00135b1.pdf [file c9mo00135b1.pdf]

**Supplementary file 1:**

| <b>Marker</b> | <b>Gene</b> | <b>Forward Sequence</b> | <b>Reverse Sequence</b> |
|---------------|-------------|-------------------------|-------------------------|
| Stabilin-2    | STAB2       | CCTGTGAAACCTGTGCTGAC    | CCATCGCCATCTAGTCCACTG   |
| PECAM-1       | CD31        | GCAACACAGTCCAGAT        | GACCTCAAAGTGGGCA        |
| VE-Cadherin   | CD144       | CCGCAATAGACAAGGA        | AGGGTAAAGTTGTTCT        |
| Beta Actin    | BACT        | TTGCCAATGGTGATGA        | CCTCATGAAGATCCTC        |

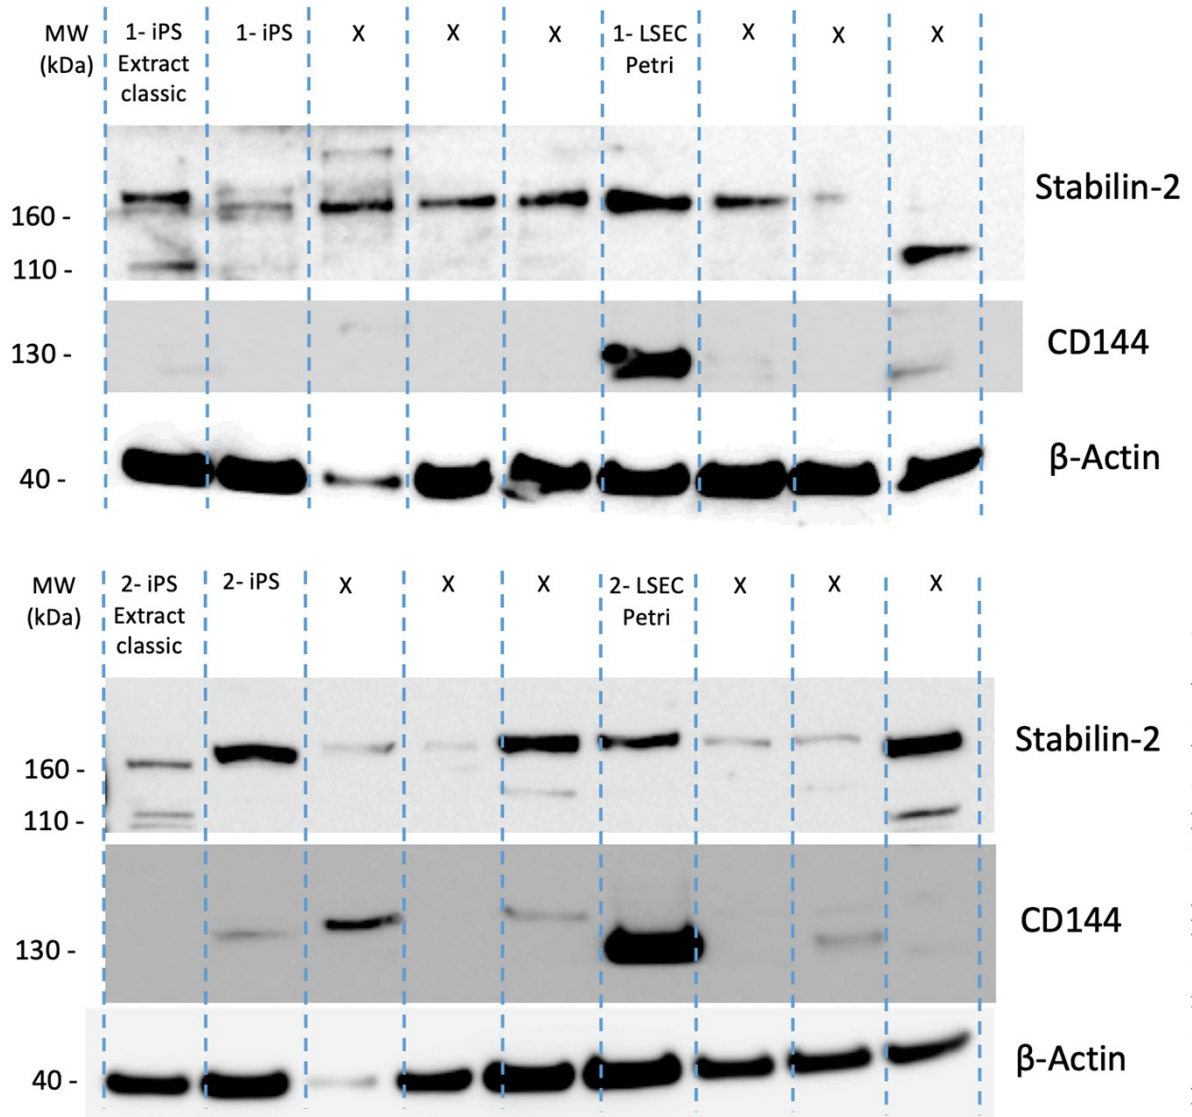

First and second duplicate of total protein extract from hiPSs and hiPSCs-derived LSECs analyzed with Western Blots for Stabilin 2, CD144 and Beta-Actin. Samples named X are currently used for another research project. The sample named iPS Extract classic, corresponds to a different extraction method in which the total protein were directly extracted from the cell lysate (20 mM HEPES pH 7.4, 142 mM KCl, 5 mM MgCl<sub>2</sub>, 1 mM EDTA, 5% glycerol, 1% NP40 and 0.1% SDS) supplemented with freshly added protease and phosphatase inhibitors.

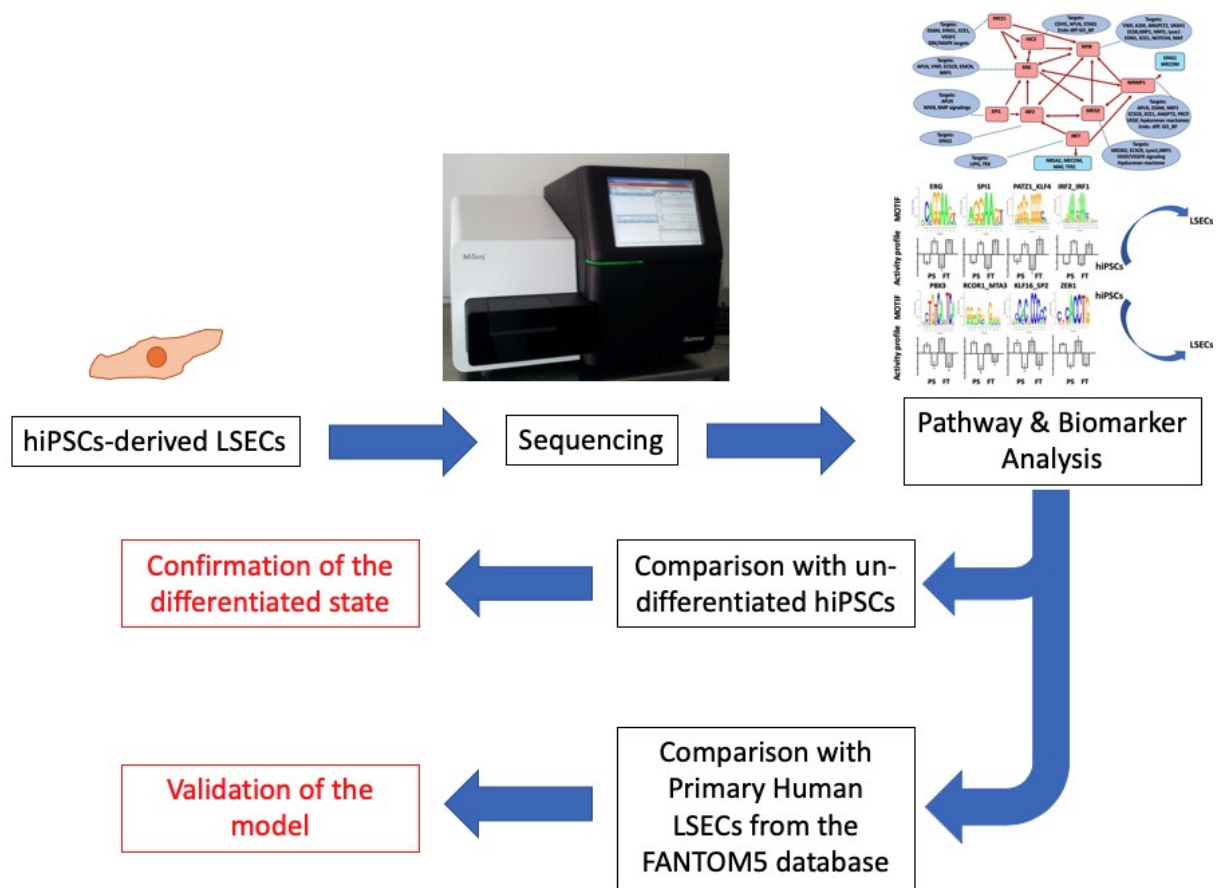

Methodology of the transcriptomic analysis performed in the current work.
