# Supplementary material for: Transcriptome profiling of hiPSC-derived LSECs with nanoCAGE
Source: Royal Society of Chemistry journal article supplement (doi:10.1039/c9mo00135b), 2020-01-10
Supplement: c9mo00135b3.xlsx [file c9mo00135b3.xlsx]

## Sheet: GOBP
Enriched pathways in DEGs for the selected comparison:
Direction	adj.Pval	nGenes	Pathways
Down regulated	2.2e-22	276	Nervous system development
	8.7e-22	249	Cell development
	7.8e-19	153	Cellular component morphogenesis
	1.2e-18	143	Cell morphogenesis
	1.5e-18	197	Neurogenesis
	8.9e-18	185	Generation of neurons
	8.9e-18	104	Neuron projection morphogenesis
	1.3e-17	105	Plasma membrane bounded cell projection morphogenesis
	2.7e-17	135	Neuron projection development
	4.0e-17	106	Cell part morphogenesis
	1.5e-16	169	Neuron differentiation
	1.5e-16	146	Neuron development
	1.6e-16	276	Anatomical structure morphogenesis
	1.6e-16	441	System development
Up regulated	6.0e-35	101	Angiogenesis
	1.8e-32	106	Blood vessel morphogenesis
	1.8e-31	143	Circulatory system development
	2.4e-31	114	Vasculature development
	3.3e-31	127	Tube morphogenesis
	4.3e-31	111	Blood vessel development
	5.8e-27	135	Tube development
	6.5e-26	272	Regulation of multicellular organismal process
	4.7e-25	355	Regulation of response to stimulus
	1.0e-23	115	Regulation of cell motility
	1.7e-23	122	Regulation of locomotion
	1.8e-23	110	Regulation of cell migration
	1.8e-23	65	Regulation of vasculature development
	2.8e-23	282	Regulation of signal transduction

## Sheet: GOMLF
Enriched pathways in DEGs for the selected comparison:
Direction	adj.Pval	nGenes	Pathways
Down regulated	9.4e-10	103	Structural molecule activity
	6.5e-09	40	Structural constituent of ribosome
	9.4e-09	228	Carbohydrate derivative binding
	1.0e-08	270	Anion binding
	5.1e-08	245	Small molecule binding
	1.0e-07	186	Drug binding
	1.1e-07	369	Nucleic acid binding
	1.2e-07	216	Nucleotide binding
	1.3e-07	168	Adenyl nucleotide binding
	2.2e-07	163	ATP binding
	2.2e-07	166	Adenyl ribonucleotide binding
	4.3e-07	194	Purine nucleotide binding
	6.9e-07	193	Ribonucleotide binding
	6.9e-07	192	Purine ribonucleotide binding
Up regulated	2.7e-10	31	Growth factor binding
	1.8e-08	176	Enzyme binding
	6.7e-06	76	Protein homodimerization activity
	1.5e-05	130	Identical protein binding
	1.5e-05	275	Metal ion binding
	1.5e-05	106	Protein dimerization activity
	1.6e-05	279	Cation binding
	1.8e-05	124	Signaling receptor binding
	7.2e-05	62	Lipid binding
	7.2e-05	66	Protein domain specific binding
	7.3e-05	35	GTPase activator activity
	1.1e-04	8	Transforming growth factor beta binding
	1.2e-04	51	Enzyme activator activity
	1.2e-04	7	Low-density lipoprotein particle binding
	1.3e-04	19	Cytokine binding

## Sheet: GOCC
Enriched pathways in DEGs for the selected comparison:
Direction	adj.Pval	nGenes	Pathways
Down regulated	7.2e-18	419	Non-membrane-bounded organelle
	6.3e-15	177	Neuron part
	1.0e-12	159	Cell junction
	5.6e-12	141	Neuron projection
	1.3e-11	120	Chromosomal part
	1.9e-11	133	Plasma membrane region
	5.5e-11	113	Synapse
	7.0e-11	62	Chromosomal region
	2.0e-10	199	Plasma membrane bounded cell projection
	2.1e-10	137	Microtubule cytoskeleton
	2.1e-10	33	Cytosolic ribosome
	2.1e-10	204	Cell projection
	4.0e-10	43	Ribosomal subunit
	1.4e-09	125	Chromosome
Up regulated	1.6e-13	328	Vesicle
	2.6e-11	325	Endomembrane system
	5.9e-11	275	Extracellular space
	2.6e-10	191	Cytoplasmic vesicle
	2.6e-10	284	Extracellular region part
	1.0e-09	67	Anchoring junction
	1.4e-09	65	Adherens junction
	5.0e-09	54	Focal adhesion
	1.3e-07	206	Extracellular organelle
	1.3e-07	205	Extracellular exosome
	2.6e-07	138	Whole membrane

## Sheet: GOKEGG
Enriched pathways in DEGs for the selected comparison:
Direction	adj.Pval	nGenes	Pathways
Down regulated	5.8e-11	35	Ribosome
	4.4e-10	32	Cell cycle
	8.2e-06	31	Axon guidance
	8.2e-06	24	Glutamatergic synapse
	2.8e-04	19	Circadian entrainment
	3.3e-04	11	DNA replication
	9.0e-04	18	Progesterone-mediated oocyte maturation
	1.2e-03	15	Biosynthesis of amino acids
	1.6e-03	23	MicroRNAs in cancer
	2.6e-03	19	Carbon metabolism
	3.1e-03	22	Retrograde endocannabinoid signaling
	3.2e-03	16	Morphine addiction
	3.9e-03	54	Pathways in cancer
	6.3e-03	15	GABAergic synapse
	6.6e-03	23	Tight junction
Up regulated	1.1e-09	63	Pathways in cancer
	1.8e-08	30	NOD-like receptor signaling pathway
	1.8e-05	21	Lysosome
	5.4e-04	36	PI3K-Akt signaling pathway
	5.9e-04	16	AGE-RAGE signaling pathway in diabetic complications
	6.3e-04	31	Cytokine-cytokine receptor interaction
	7.1e-04	22	Axon guidance
	7.1e-04	15	Small cell lung cancer
	1.2e-03	23	Focal adhesion
	1.2e-03	16	TNF signaling pathway
	1.2e-03	22	Kaposi s sarcoma-associated herpesvirus infection
	1.2e-03	27	HTLV-I infection
	1.4e-03	17	Osteoclast differentiation
	1.7e-03	13	ECM-receptor interaction
	1.9e-03	29	MAPK signaling pathway

## Sheet: top-gene
Top Genes for selected comparison:
Ensembl ID	log2 Fold Change	Adj.Pval	Symbol	Chr	Type
ENSG00000214548	11.46	1.29e-45	MEG3	14q32.2	lincRNA
ENSG00000240563	-11.14	6.21e-25	L1TD1	1p31.3	protein_coding
ENSG00000125810	10.51	3.29e-36	CD93	20p11.21	protein_coding
ENSG00000261371	10.04	2.69e-36	PECAM1	17q23.3	protein_coding
IGF2;INS-IGF2	10.04	3.02e-108	NA	NANA	NA
ENSG00000151702	10.02	6.33e-34	FLI1	11q24.3	protein_coding
ENSG00000171388	9.95	1.39e-32	APLN	Xq26.1	protein_coding
ENSG00000131914	-9.76	3.98e-19	LIN28A	1p36.11	protein_coding
ENSG00000069122	9.48	1.83e-30	ADGRF5	6p12.3	protein_coding
ENSG00000091879	9.46	1.67e-29	ANGPT2	8p23.1	protein_coding
ENSG00000147113	9.38	7.54e-30	CXorf36	Xp11.3	protein_coding
ENSG00000038427	-9.33	6.64e-18	VCAN	5q14.2	protein_coding
ENSG00000133800	9.32	2.43e-29	LYVE1	11p15.4	protein_coding
ENSG00000147408	9.30	2.28e-29	CSGALNACT1	8p21.3	protein_coding
ENSG00000225746	9.30	2.86e-28	MEG8	14q32.2	lincRNA
ENSG00000154133	9.28	2.43e-27	ROBO4	11q24.2	protein_coding
ENSG00000130755	9.24	5.91e-29	GMFG	19q13.2	protein_coding
ENSG00000164125	9.23	1.10e-28	FAM198B	4q32.1	protein_coding
ENSG00000175899	9.15	1.11e-40	A2M	12p13.31	protein_coding
ENSG00000179776	9.11	2.18e-27	CDH5	16q21	protein_coding
ENSG00000133574	9.09	1.36e-27	GIMAP4	7q36.1	protein_coding
ENSG00000179144	9.05	2.14e-26	GIMAP7	7q36.1	protein_coding
ENSG00000164283	9.01	3.23e-23	ESM1	5q11.2	protein_coding
ENSG00000171115	9.00	1.54e-26	GIMAP8	7q36.1	protein_coding
ENSG00000148677	8.99	7.71e-25	ANKRD1	10q23.31	protein_coding
ENSG00000110799	8.87	1.74e-24	VWF	12p13.31	protein_coding
ENSG00000241186	-8.85	4.55e-16	TDGF1	3p21.31	protein_coding
IGF2;AC132217	8.83	1.84e-24	NA	NANA	NA
ENSG00000167244	8.78	8.98e-49	IGF2	11p15.5	protein_coding
ENSG00000163638	8.77	1.67e-24	ADAMTS9	3p14.1	protein_coding
ENSG00000171864	8.71	9.86e-25	PRND	20p13	protein_coding
ENSG00000135218	8.68	7.87e-25	CD36	7q21.11	protein_coding
IPO11;LRRC70	8.67	4.10e-24	NA	NANA	NA
ENSG00000174059	8.59	4.73e-23	CD34	1q32.2	protein_coding
ENSG00000198780	-8.54	1.09e-13	FAM169A	5q13.3	protein_coding
ENSG00000099260	8.52	7.44e-24	PALMD	1p21.2	protein_coding
ENSG00000204531	-8.50	1.05e-14	POU5F1	6p21.33	protein_coding
ENSG00000272398	-8.50	1.26e-11	CD24	6q21	protein_coding
AC005062	-8.49	2.64e-14	NA	NANA	NA
ENSG00000149564	8.48	7.94e-21	ESAM	11q24.2	protein_coding
PLCL1	8.46	7.01e-22	NA	NANA	NA
ENSG00000152208	-8.45	6.30e-15	GRID2	4q22.1	protein_coding
ENSG00000130600	8.38	9.06e-22	H19	11p15.5	processed_transcript
SDPR	8.25	8.53e-21	NA	NANA	NA
ENSG00000186439	-8.21	1.97e-13	TRDN	6q22.31	protein_coding
ENSG00000225366	-8.20	1.40e-13	TDGF1P3	Xq23	transcribed_processed_pseudogene
RASGRP3	8.15	8.32e-19	NA	NANA	NA
ENSG00000169554	8.14	9.52e-22	ZEB2	2q22.3	protein_coding
ENSG00000171408	8.13	5.36e-20	PDE7B	6q23.3	protein_coding
ENSG00000157554	8.08	2.56e-26	ERG	21q22.2	protein_coding

## Sheet: 300Bp
List	Motif	TF	TF family	FDR
Down regulated	CCG	DNMT1	CxxC	2.3E-13
	TGCGGG	ZBTB1	C2H2 ZF	7.3E-12
	CACGTG	TCFL5	bHLH	7.5E-11
	CG	CGBP	CxxC	3.6E-10
	CG	TET1	CxxC	4.2E-10
	GGGGGCGGGGC	SP2	C2H2 ZF	4.2E-10
	GCGGGGGCGGGG	EGR1	C2H2 ZF	4.2E-10
	GGCGCC	E2F2	E2F	8.1E-10
	GGGGGCGGGG	SP1	C2H2 ZF	1.9E-08
	GGCGGGAA	E2F4	E2F	1.9E-08
	CG	MLL	CxxC	2.5E-08
	TCGCGCCAAA	E2F1	E2F	7.7E-08
	GGGCGGGAG	E2F1	E2F	9.7E-08
	TGCGTGGGCGT	EGR3	C2H2 ZF	2.1E-07
	GGGCGTG	KLF7	C2H2 ZF	4.2E-07
	TGCGTGGGCGT	EGR1	C2H2 ZF	4.2E-07
	CACGCG	HES4	bHLH	5.6E-07
	TGCGTGGGCG	EGR2	C2H2 ZF	6.4E-07
	CCCCGGGC	TFAP2A	AP-2	1.6E-06
	GGGCGGGAA	E2F6	E2F	2.7E-06
Up regulated	GTGGGGA	MZF1	C2H2 ZF	8.6E-03
	GGGGA	MZF1	C2H2 ZF	1.4E-02
	GGAGGAGGAGGGGGAGGAGG	ZNF263	C2H2 ZF	1.7E-02
	GGGATTTCC	REL	Rel	2.9E-02
	GGGATTTCC	REL	Rel	3.6E-02
	GGGAATTTCC	NFKB1	Rel	4.9E-02
	AAAGTGAAAGTGAAAGT	IRF1	IRF	4.9E-02
	GGGAATTTCC	RELA	Rel	4.9E-02
	GGGAATTTCC	RELA	Rel	5.2E-02
	GGAAAGTGAAAGCAAA	IRF2	IRF	6.5E-02
	GGGGACTTTCC	NFKB1	Rel	1.5E-01
	GAGGGGGAA	MZF1	C2H2 ZF	1.5E-01
	TGGGAATACC	IKZF4	C2H2 ZF	1.6E-01
	CAGGAAGG	EHF	Ets	1.8E-01
	GCAGCTG	NHLH2	bHLH	1.8E-01
	TAGGAAATCGAAAGT	IRF7	IRF	1.8E-01
	CAGCTG	ASCL2	bHLH	1.8E-01
	GAAAAGTGAAACC	IRF2	IRF	2.0E-01
	CACATTCCTCCG	TEAD1	TEA	2.3E-01

## Sheet: 600Bp
List	Motif	TF	TF family	FDR
Down regulated	GGCGCC	E2F2	E2F	4.6E-13
	CCG	DNMT1	CxxC	1.9E-11
	GGGGGCGGGGC	SP2	C2H2 ZF	2.7E-11
	TGCGGG	ZBTB1	C2H2 ZF	9.6E-10
	CACGTG	TCFL5	bHLH	1.5E-09
	GGGGGCGGGG	SP1	C2H2 ZF	1.9E-09
	GCGGGGGCGGGG	EGR1	C2H2 ZF	4.2E-09
	CG	CGBP	CxxC	4.6E-09
	GGGCGGGAG	E2F1	E2F	1.1E-08
	GGCGGGAA	E2F4	E2F	3.5E-08
	GGGCGTG	KLF7	C2H2 ZF	3.3E-07
	TCGCGCCAAA	E2F1	E2F	4.3E-07
	CG	MLL	CxxC	4.3E-07
	GCGCAGGCGC	NRF1	Unknown	5.6E-07
	TGCGTGGGCGT	EGR3	C2H2 ZF	9.4E-07
	AGATCTCGCGAGA	ZBTB33	C2H2 ZF	1.4E-06
	TGCGTGGGCGT	EGR1	C2H2 ZF	1.4E-06
	GGGGGGGGGCC	PATZ1	C2H2 ZF	1.4E-06
	CG	TET1	CxxC	1.4E-06
	GGGCGGGGC	KLF5	C2H2 ZF	1.8E-06
Up regulated	GTGGGGA	MZF1	C2H2 ZF	1.4E-03
	CAGGAAGG	EHF	Ets	3.7E-02
	AAAGTGAAAGTGAAAGT	IRF1	IRF	3.7E-02
	GGAAAGTGAAAGCAAA	IRF2	IRF	3.7E-02
	AGAGGAA	SPIB	Ets	3.7E-02
	GGGAATTTCC	RELA	Rel	3.7E-02
	GGAGGAGGAGGGGGAGGAGG	ZNF263	C2H2 ZF	3.7E-02
	GAGGGGGAA	MZF1	C2H2 ZF	3.7E-02
	GGGGACTTTCC	NFKB1	Rel	3.7E-02
	GGGAATTTCC	RELA	Rel	3.7E-02
	TTTCCA	NFATC3	Rel	4.5E-02
	GGGAATTTCC	NFKB1	Rel	4.5E-02
	GAAAGTGAAAGT	PRDM1	C2H2 ZF	5.3E-02
	TAGGAAATCGAAAGT	IRF7	IRF	5.6E-02
	TTTCCA	NFATC2	Rel	6.6E-02
	AGGGGGA	MZF1	C2H2 ZF	6.6E-02
	GGGGA	MZF1	C2H2 ZF	8.2E-02
	TGGGAATACC	IKZF4	C2H2 ZF	8.2E-02
	TAAACAA	FOXO1	Forkhead	8.2E-02
	TGACA	SNAI3	C2H2 ZF	1.2E-01
