# Supplementary material for: Transcriptome profiling of hiPSC-derived LSECs with nanoCAGE
Source: Royal Society of Chemistry journal article supplement (doi:10.1039/c9mo00135b), 2020-01-10
Supplement: c9mo00135b5.xlsx [file c9mo00135b5.xlsx]

## Sheet: PATZ1
Top targets:
Search:
Show 102550100 entries
Promoter	Score	Transcript	Gene	Gene Info
chr17_-_66453562	5.57	ENST00000262139.5	WIPI1	WD repeat domain, phosphoinositide interacting 1
		ENST00000546360.1
chr22_+_51112800	4.37	ENST00000414786.2	SHANK3	SH3 and multiple ankyrin repeat domains 3
chr3_-_132441209	3.53	ENST00000383282.2	NPHP3	nephronophthisis 3 (adolescent)
		ENST00000326682.8
		ENST00000343113.4
		ENST00000337331.5
chr11_-_2158507	3.27	ENST00000381392.1	IGF2	insulin-like growth factor 2 (somatomedin A)
		ENST00000381395.1
		ENST00000418738.2
chr22_+_31477296	3.16	ENST00000426927.1	SMTN	smoothelin
		ENST00000440425.1
		ENST00000358743.1
		ENST00000347557.2
		ENST00000333137.7
chr17_+_75136980	3.04	ENST00000585618.1	SEC14L1	SEC14-like 1 (S. cerevisiae)
		ENST00000413679.2
chr2_+_10442993	2.85	ENST00000423674.1	HPCAL1	hippocalcin-like 1
		ENST00000307845.3
chr4_-_37687991	2.78	ENST00000314117.4	RELL1	RELT-like 1
		ENST00000454158.2
chr19_+_4639514	2.69	ENST00000327473.4	TNFAIP8L1	tumor necrosis factor, alpha-induced protein 8-like 1
chr10_+_31608054	2.68	ENST00000320985.10	ZEB1	zinc finger E-box binding homeobox 1
		ENST00000361642.5
		ENST00000560721.2
		ENST00000558440.1
		ENST00000424869.1
		ENST00000542815.3
Showing 1 to 10 of 200 entries
Previous
1
2
3
4
5
…
20
Next
Gene Ontology Analysis
Gene overrepresentation in biological_process category:
Search:
Show 102550100 entries
Log-likelihood per target	Total log-likelihood	Term	Description
0.1	12.0	GO:0042147	retrograde transport, endosome to Golgi(GO:0042147)
0.4	9.3	GO:0031581	hemidesmosome assembly(GO:0031581)
1.4	8.6	GO:1902612	regulation of anti-Mullerian hormone signaling pathway(GO:1902612) negative regulation of anti-Mullerian hormone signaling pathway(GO:1902613) anti-Mullerian hormone signaling pathway(GO:1990262)
0.7	8.0	GO:0015871	choline transport(GO:0015871)
1.0	7.9	GO:2000467	positive regulation of glycogen (starch) synthase activity(GO:2000467)
2.3	6.9	GO:0048203	vesicle targeting, trans-Golgi to endosome(GO:0048203)
0.2	6.7	GO:0097576	vacuole fusion(GO:0097576)
0.5	6.4	GO:0018401	peptidyl-proline hydroxylation to 4-hydroxy-L-proline(GO:0018401)
0.7	5.9	GO:0006049	UDP-N-acetylglucosamine catabolic process(GO:0006049)
0.2	5.8	GO:0032007	negative regulation of TOR signaling(GO:0032007)
Showing 1 to 10 of 1,213 entries
Previous
1
2
3
4
5
…
122
Next
Gene overrepresentation in C2:CP:REACTOME category:
Search:
Show 102550100 entries
Log-likelihood per target	Total log-likelihood	Term	Description
0.4	12.4	REACTOME_CASPASE_MEDIATED_CLEAVAGE_OF_CYTOSKELETAL_PROTEINS	b'Genes involved in Caspase-mediated cleavage of cytoskeletal proteins'
0.3	12.3	REACTOME_ERK_MAPK_TARGETS	b'Genes involved in ERK/MAPK targets'
0.1	10.4	REACTOME_ACTIVATION_OF_CHAPERONE_GENES_BY_XBP1S	b'Genes involved in Activation of Chaperone Genes by XBP1(S)'
0.1	9.7	REACTOME_TRANSCRIPTIONAL_REGULATION_OF_WHITE_ADIPOCYTE_DIFFERENTIATION	b'Genes involved in Transcriptional Regulation of White Adipocyte Differentiation'
0.4	9.6	REACTOME_REGULATION_OF_INSULIN_LIKE_GROWTH_FACTOR_IGF_ACTIVITY_BY_INSULIN_LIKE_GROWTH_FACTOR_BINDING_PROTEINS_IGFBPS	b'Genes involved in Regulation of Insulin-like Growth Factor (IGF) Activity by Insulin-like Growth Factor Binding Proteins (IGFBPs)'
0.0	9.1	REACTOME_SIGNALING_BY_RHO_GTPASES	b'Genes involved in Signaling by Rho GTPases'
0.2	9.0	REACTOME_REGULATION_OF_HYPOXIA_INDUCIBLE_FACTOR_HIF_BY_OXYGEN	b'Genes involved in Regulation of Hypoxia-inducible Factor (HIF) by Oxygen'
0.1	8.7	REACTOME_INTEGRIN_CELL_SURFACE_INTERACTIONS	b'Genes involved in Integrin cell surface interactions'
0.2	7.5	REACTOME_BMAL1_CLOCK_NPAS2_ACTIVATES_CIRCADIAN_EXPRESSION	b'Genes involved in BMAL1:CLOCK/NPAS2 Activates Circadian Expression'
0.2	7.1	REACTOME_IRON_UPTAKE_AND_TRANSPORT	b'Genes involved in Iron uptake and transport'
Showing 1 to 10 of 156 entries
Previous
1
2
3
4
5
…
16
Next
Gene overrepresentation in cellular_component category:
Search:
Show 102550100 entries
Log-likelihood per target	Total log-likelihood	Term	Description
0.0	16.1	GO:0005794	Golgi apparatus(GO:0005794)
0.1	14.5	GO:0005788	endoplasmic reticulum lumen(GO:0005788)
0.1	12.3	GO:0030864	cortical actin cytoskeleton(GO:0030864)
0.1	10.3	GO:0031093	platelet alpha granule lumen(GO:0031093)
0.0	9.2	GO:0016607	nuclear speck(GO:0016607)
0.1	9.1	GO:0005770	late endosome(GO:0005770)
0.4	8.9	GO:0034045	pre-autophagosomal structure membrane(GO:0034045)
0.2	8.4	GO:0031092	platelet alpha granule membrane(GO:0031092)
0.1	8.1	GO:0070821	tertiary granule membrane(GO:0070821)
0.2	7.8	GO:0000145	exocyst(GO:0000145)
Showing 1 to 10 of 393 entries
Previous
1
2
3
4
5
…
40
Next
Gene overrepresentation in molecular_function category:
Search:
Show 102550100 entries
Log-likelihood per target	Total log-likelihood	Term	Description
0.1	20.2	GO:0003779	actin binding(GO:0003779)
0.0	15.3	GO:0005096	GTPase activator activity(GO:0005096)
0.4	14.4	GO:0080025	phosphatidylinositol-3,5-bisphosphate binding(GO:0080025)
0.1	13.0	GO:0051015	actin filament binding(GO:0051015)
0.3	10.8	GO:0005179	hormone activity(GO:0005179)
0.1	10.4	GO:0008307	structural constituent of muscle(GO:0008307)
0.2	10.2	GO:0005484	SNAP receptor activity(GO:0005484)
0.3	8.6	GO:0071889	14-3-3 protein binding(GO:0071889)
0.1	8.5	GO:0019003	GDP binding(GO:0019003)
0.3	8.1	GO:0043236	laminin binding(GO:0043236)
Showing 1 to 10 of 630 entries
Previous
1
2
3
4
5
…
63
Next
Gene overrepresentation in C2:CP category:
Search:
Show 102550100 entries
Log-likelihood per target	Total log-likelihood	Term	Description
0.1	23.1	NABA_ECM_REGULATORS	b'Genes encoding enzymes and their regulators involved in the remodeling of the extracellular matrix'
0.2	14.7	PID_ARF6_TRAFFICKING_PATHWAY	b'Arf6 trafficking events'
0.2	12.6	SIG_PIP3_SIGNALING_IN_B_LYMPHOCYTES	b'Genes related to PIP3 signaling in B lymphocytes'
0.2	11.0	PID_HIF2PATHWAY	b'HIF-2-alpha transcription factor network'
0.1	10.3	PID_HDAC_CLASSI_PATHWAY	b'Signaling events mediated by HDAC Class I'
0.2	9.0	ST_WNT_BETA_CATENIN_PATHWAY	b'Wnt/beta-catenin Pathway'
0.2	7.9	NABA_BASEMENT_MEMBRANES	b'Genes encoding structural components of basement membranes'
0.3	6.6	PID_S1P_S1P1_PATHWAY	b'S1P1 pathway'
0.2	6.6	PID_AVB3_OPN_PATHWAY	b'Osteopontin-mediated events'
0.4	6.1	PID_VEGF_VEGFR_PATHWAY	b'VEGF and VEGFR signaling network'
Showing 1 to 10 of 121 entries
Previous
1
2
3
4
5
…
13
Next

## Sheet: BATF
Top targets:
Search:
Show 102550100 entries
Promoter	Score	Transcript	Gene	Gene Info
chr1_+_223889285	2.20	ENST00000433674.2	CAPN2	calpain 2, (m/II) large subunit
chr7_-_92777606	1.91	ENST00000437805.1	SAMD9L	sterile alpha motif domain containing 9-like
		ENST00000446959.1
		ENST00000439952.1
		ENST00000414791.1
		ENST00000446033.1
		ENST00000411955.1
		ENST00000318238.4
chr3_-_149095652	1.78	ENST00000305366.3	TM4SF1	transmembrane 4 L six family member 1
chr15_-_70994612	1.77	ENST00000558758.1	UACA	uveal autoantigen with coiled-coil domains and ankyrin repeats
		ENST00000379983.2
		ENST00000560441.1
chr10_+_91087651	1.68	ENST00000371818.4	IFIT3	interferon-induced protein with tetratricopeptide repeats 3
chr7_+_150211918	1.56	ENST00000313543.4	GIMAP7	GTPase, IMAP family member 7
chr2_+_161993412	1.55	ENST00000259075.2	TANK	TRAF family member-associated NFKB activator
		ENST00000432002.1
chr12_+_13349650	1.41	ENST00000256951.5	EMP1	epithelial membrane protein 1
		ENST00000431267.2
		ENST00000542474.1
		ENST00000544053.1
chr11_-_2162162	1.40	ENST00000381389.1	IGF2	insulin-like growth factor 2 (somatomedin A)
chr11_-_2162468	1.40	ENST00000434045.2	IGF2	insulin-like growth factor 2 (somatomedin A)
Showing 1 to 10 of 200 entries
Previous
1
2
3
4
5
…
20
Next
Gene Ontology Analysis
Gene overrepresentation in molecular_function category:
Search:
Show 102550100 entries
Log-likelihood per target	Total log-likelihood	Term	Description
0.0	0.3	GO:0004012	phospholipid-translocating ATPase activity(GO:0004012)
0.0	0.1	GO:0008330	protein tyrosine/threonine phosphatase activity(GO:0008330)
0.0	0.1	GO:0016802	adenosylhomocysteinase activity(GO:0004013) trialkylsulfonium hydrolase activity(GO:0016802)
0.0	0.1	GO:0098770	FBXO family protein binding(GO:0098770)
0.0	0.1	GO:0008429	phosphatidylethanolamine binding(GO:0008429)
0.0	0.1	GO:0016813	hydrolase activity, acting on carbon-nitrogen (but not peptide) bonds, in linear amidines(GO:0016813)
Showing 1 to 6 of 6 entries
Previous
1
Next
Gene overrepresentation in biological_process category:
Search:
Show 102550100 entries
Log-likelihood per target	Total log-likelihood	Term	Description
0.0	0.3	GO:0045332	phospholipid translocation(GO:0045332)
0.0	0.2	GO:0045054	constitutive secretory pathway(GO:0045054)
0.0	0.2	GO:0006384	transcription initiation from RNA polymerase III promoter(GO:0006384)
0.0	0.1	GO:0061534	gamma-aminobutyric acid secretion, neurotransmission(GO:0061534)
0.0	0.1	GO:1902626	assembly of large subunit precursor of preribosome(GO:1902626)
0.0	0.1	GO:0090206	negative regulation of cholesterol biosynthetic process(GO:0045541) negative regulation of cholesterol metabolic process(GO:0090206)
0.0	0.1	GO:0033353	S-adenosylmethionine cycle(GO:0033353)
0.0	0.1	GO:0000050	urea cycle(GO:0000050) urea metabolic process(GO:0019627)
0.0	0.1	GO:1901895	negative regulation of calcium-transporting ATPase activity(GO:1901895)
0.0	0.1	GO:0045204	MAPK export from nucleus(GO:0045204)
Showing 1 to 10 of 11 entries
Previous
1
2
Next
Gene overrepresentation in cellular_component category:
Search:
Show 102550100 entries
Log-likelihood per target	Total log-likelihood	Term	Description
0.2	4.7	GO:0097342	ripoptosome(GO:0097342)
0.0	4.5	GO:0030027	lamellipodium(GO:0030027)
0.0	4.0	GO:0031093	platelet alpha granule lumen(GO:0031093)
0.1	3.2	GO:0097038	perinuclear endoplasmic reticulum(GO:0097038)
0.0	2.7	GO:0005901	caveola(GO:0005901)
0.2	2.6	GO:0070022	transforming growth factor beta receptor homodimeric complex(GO:0070022)
0.0	1.8	GO:0035577	azurophil granule membrane(GO:0035577)
0.1	1.6	GO:0031362	anchored component of external side of plasma membrane(GO:0031362)
0.0	1.5	GO:0031092	platelet alpha granule membrane(GO:0031092)
0.0	1.5	GO:0030173	integral component of Golgi membrane(GO:0030173)
Showing 1 to 10 of 117 entries
Previous
1
2
3
4
5
…
12
Next
Gene overrepresentation in cellular_component category:
Search:
Show 102550100 entries
Log-likelihood per target	Total log-likelihood	Term	Description
0.0	0.1	GO:0000839	Hrd1p ubiquitin ligase ERAD-L complex(GO:0000839)
0.0	0.1	GO:0071148	TEAD-1-YAP complex(GO:0071148)
Showing 1 to 2 of 2 entries
Previous
1
Next
Gene overrepresentation in biological_process category:
Search:
Show 102550100 entries
Log-likelihood per target	Total log-likelihood	Term	Description
0.4	4.3	GO:1903943	regulation of hepatocyte apoptotic process(GO:1903943) negative regulation of hepatocyte apoptotic process(GO:1903944)
0.1	4.3	GO:0032731	positive regulation of interleukin-1 beta production(GO:0032731)
0.3	3.4	GO:0035457	cellular response to interferon-alpha(GO:0035457)
0.2	3.1	GO:0016540	protein autoprocessing(GO:0016540)
0.4	2.8	GO:2000158	positive regulation of ubiquitin-specific protease activity(GO:2000158)
0.3	2.8	GO:2000467	positive regulation of glycogen (starch) synthase activity(GO:2000467)
0.9	2.6	GO:2000563	B cell tolerance induction(GO:0002514) regulation of B cell tolerance induction(GO:0002661) positive regulation of B cell tolerance induction(GO:0002663) lens fiber cell apoptotic process(GO:1990086) positive regulation of CD4-positive, alpha-beta T cell proliferation(GO:2000563)
0.1	2.4	GO:0030214	hyaluronan catabolic process(GO:0030214)
0.3	2.1	GO:1902748	positive regulation of lens fiber cell differentiation(GO:1902748)
0.1	2.0	GO:0034058	endosomal vesicle fusion(GO:0034058)
Showing 1 to 10 of 288 entries
Previous
1
2
3
4
5
…
29
Next
Gene overrepresentation in molecular_function category:
Search:
Show 102550100 entries
Log-likelihood per target	Total log-likelihood	Term	Description
0.0	4.5	GO:0005525	GTP binding(GO:0005525)
0.1	4.3	GO:0097200	cysteine-type endopeptidase activity involved in execution phase of apoptosis(GO:0097200)
0.2	3.4	GO:0034713	type I transforming growth factor beta receptor binding(GO:0034713)
0.1	3.2	GO:0004198	calcium-dependent cysteine-type endopeptidase activity(GO:0004198)
0.1	3.2	GO:0005179	hormone activity(GO:0005179)
0.0	3.0	GO:0001047	core promoter binding(GO:0001047)
0.4	2.8	GO:0035800	deubiquitinase activator activity(GO:0035800)
0.0	1.9	GO:0005089	Rho guanyl-nucleotide exchange factor activity(GO:0005089)
0.0	1.8	GO:0070412	R-SMAD binding(GO:0070412)
0.4	1.7	GO:0003810	protein-glutamine gamma-glutamyltransferase activity(GO:0003810)
Showing 1 to 10 of 217 entries
Previous
1
2
3
4
5
…
22
Next
Gene overrepresentation in C2:CP:REACTOME category:
Search:
Show 102550100 entries
Log-likelihood per target	Total log-likelihood	Term	Description
0.2	4.5	REACTOME_REGULATION_OF_INSULIN_LIKE_GROWTH_FACTOR_IGF_ACTIVITY_BY_INSULIN_LIKE_GROWTH_FACTOR_BINDING_PROTEINS_IGFBPS	b'Genes involved in Regulation of Insulin-like Growth Factor (IGF) Activity by Insulin-like Growth Factor Binding Proteins (IGFBPs)'
0.1	4.5	REACTOME_INTERFERON_ALPHA_BETA_SIGNALING	b'Genes involved in Interferon alpha/beta signaling'
0.1	4.3	REACTOME_EXTRINSIC_PATHWAY_FOR_APOPTOSIS	b'Genes involved in Extrinsic Pathway for Apoptosis'
0.2	3.4	REACTOME_TGF_BETA_RECEPTOR_SIGNALING_IN_EMT_EPITHELIAL_TO_MESENCHYMAL_TRANSITION	b'Genes involved in TGF-beta receptor signaling in EMT (epithelial to mesenchymal transition)'
0.0	3.2	REACTOME_RESPONSE_TO_ELEVATED_PLATELET_CYTOSOLIC_CA2_	b'Genes involved in Response to elevated platelet cytosolic Ca2+'
0.2	2.8	REACTOME_HYALURONAN_UPTAKE_AND_DEGRADATION	b'Genes involved in Hyaluronan uptake and degradation'
0.0	2.7	REACTOME_SIGNALING_BY_RHO_GTPASES	b'Genes involved in Signaling by Rho GTPases'
0.1	2.5	REACTOME_TRAF6_MEDIATED_IRF7_ACTIVATION	b'Genes involved in TRAF6 mediated IRF7 activation'
0.1	1.3	REACTOME_THE_ACTIVATION_OF_ARYLSULFATASES	b'Genes involved in The activation of arylsulfatases'
0.0	1.2	REACTOME_LATENT_INFECTION_OF_HOMO_SAPIENS_WITH_MYCOBACTERIUM_TUBERCULOSIS	b'Genes involved in Latent infection of Homo sapiens with Mycobacterium tuberculosis'
Showing 1 to 10 of 58 entries
Previous
1
2
3
4
5
6
Next
Gene overrepresentation in C2:CP category:
Search:
Show 102550100 entries
Log-likelihood per target	Total log-likelihood	Term	Description
0.0	4.4	PID_FAK_PATHWAY	b'Signaling events mediated by focal adhesion kinase'
0.1	4.3	SA_FAS_SIGNALING	b'The TNF-type receptor Fas induces apoptosis on ligand binding.'
0.1	3.7	PID_GLYPICAN_1PATHWAY	b'Glypican 1 network'
0.0	3.5	PID_CASPASE_PATHWAY	b'Caspase cascade in apoptosis'
0.0	2.6	PID_AJDISS_2PATHWAY	b'Posttranslational regulation of adherens junction stability and dissassembly'
0.0	2.1	PID_FCER1_PATHWAY	b'Fc-epsilon receptor I signaling in mast cells'
0.1	2.0	PID_INTEGRIN_A9B1_PATHWAY	b'Alpha9 beta1 integrin signaling events'
0.0	2.0	NABA_ECM_REGULATORS	b'Genes encoding enzymes and their regulators involved in the remodeling of the extracellular matrix'
0.1	1.4	PID_TCR_JNK_PATHWAY	b'JNK signaling in the CD4+ TCR pathway'
0.1	1.4	PID_IL2_STAT5_PATHWAY	b'IL2 signaling events mediated by STAT5'
Showing 1 to 10 of 56 entries
Previous
1
2
3
4
5
6
Next

## Sheet: NFIB
Top targets:
Search:
Show 102550100 entries
Promoter	Score	Transcript	Gene	Gene Info
chr2_-_192711968	2.18	ENST00000304141.4	SDPR	serum deprivation response
chr12_-_6233828	1.75	ENST00000572068.1	VWF	von Willebrand factor
		ENST00000261405.5
chr6_-_32191834	1.56	ENST00000375023.3	NOTCH4	notch 4
chr5_-_172198190	1.55	ENST00000239223.3	DUSP1	dual specificity phosphatase 1
chr2_+_191208196	1.49	ENST00000392329.2	INPP1	inositol polyphosphate-1-phosphatase
		ENST00000322522.4
		ENST00000430311.1
		ENST00000541441.1
chr12_-_71003568	1.43	ENST00000547715.1	PTPRB	protein tyrosine phosphatase, receptor type, B
		ENST00000451516.2
		ENST00000538708.1
		ENST00000550857.1
		ENST00000261266.5
chr16_+_15737124	1.41	ENST00000396355.1	NDE1	nudE neurodevelopment protein 1
		ENST00000396353.2
chr12_-_9268707	1.39	ENST00000318602.7	A2M	alpha-2-macroglobulin
chr11_-_65381643	1.34	ENST00000309100.3	MAP3K11	mitogen-activated protein kinase kinase kinase 11
		ENST00000529839.1
		ENST00000526293.1
chr11_-_2170786	1.31	ENST00000300632.5	IGF2	insulin-like growth factor 2 (somatomedin A)
Showing 1 to 10 of 200 entries
Previous
1
2
3
4
5
…
20
Next
Gene Ontology Analysis
Gene overrepresentation in molecular_function category:
Search:
Show 102550100 entries
Log-likelihood per target	Total log-likelihood	Term	Description
0.0	8.3	GO:0003779	actin binding(GO:0003779)
0.1	7.5	GO:0050840	extracellular matrix binding(GO:0050840)
0.0	7.2	GO:0005096	GTPase activator activity(GO:0005096)
0.1	4.6	GO:0005179	hormone activity(GO:0005179)
0.0	3.3	GO:0005178	integrin binding(GO:0005178)
0.2	2.6	GO:0001011	transcription factor activity, sequence-specific DNA binding, RNA polymerase recruiting(GO:0001011) transcription factor activity, TFIIB-class binding(GO:0001087)
0.1	2.3	GO:0005520	insulin-like growth factor binding(GO:0005520)
0.1	2.3	GO:0070888	E-box binding(GO:0070888)
0.1	2.2	GO:0043325	phosphatidylinositol-3,4-bisphosphate binding(GO:0043325)
0.1	2.2	GO:0019198	transmembrane receptor protein tyrosine phosphatase activity(GO:0005001) transmembrane receptor protein phosphatase activity(GO:0019198)
Showing 1 to 10 of 389 entries
Previous
1
2
3
4
5
…
39
Next
Gene overrepresentation in cellular_component category:
Search:
Show 102550100 entries
Log-likelihood per target	Total log-likelihood	Term	Description
0.0	6.7	GO:0005788	endoplasmic reticulum lumen(GO:0005788)
0.0	6.0	GO:0016607	nuclear speck(GO:0016607)
0.1	5.2	GO:0031093	platelet alpha granule lumen(GO:0031093)
0.0	5.0	GO:0030027	lamellipodium(GO:0030027)
0.1	4.5	GO:0070821	tertiary granule membrane(GO:0070821)
0.0	4.0	GO:0043202	lysosomal lumen(GO:0043202)
0.3	2.7	GO:0033093	Weibel-Palade body(GO:0033093)
0.0	2.1	GO:0005793	endoplasmic reticulum-Golgi intermediate compartment(GO:0005793)
0.1	2.0	GO:0000145	exocyst(GO:0000145)
0.0	2.0	GO:0030864	cortical actin cytoskeleton(GO:0030864)
Showing 1 to 10 of 234 entries
Previous
1
2
3
4
5
…
24
Next
Gene overrepresentation in biological_process category:
Search:
Show 102550100 entries
Log-likelihood per target	Total log-likelihood	Term	Description
0.0	3.5	GO:0060337	type I interferon signaling pathway(GO:0060337) cellular response to type I interferon(GO:0071357)
0.4	3.2	GO:0045602	negative regulation of endothelial cell differentiation(GO:0045602)
0.2	2.9	GO:0061299	retina vasculature morphogenesis in camera-type eye(GO:0061299)
0.2	2.8	GO:1900745	positive regulation of p38MAPK cascade(GO:1900745)
0.0	2.5	GO:0035335	peptidyl-tyrosine dephosphorylation(GO:0035335)
0.0	2.1	GO:0030574	collagen catabolic process(GO:0030574)
0.2	2.0	GO:0015871	choline transport(GO:0015871)
0.5	1.9	GO:1901491	negative regulation of lymphangiogenesis(GO:1901491)
0.2	1.8	GO:0032347	regulation of aldosterone metabolic process(GO:0032344) regulation of aldosterone biosynthetic process(GO:0032347)
0.2	1.8	GO:0007597	blood coagulation, intrinsic pathway(GO:0007597)
Showing 1 to 10 of 647 entries
Previous
1
2
3
4
5
…
65
Next
Gene overrepresentation in C2:CP category:
Search:
Show 102550100 entries
Log-likelihood per target	Total log-likelihood	Term	Description
0.1	12.7	NABA_ECM_GLYCOPROTEINS	b'Genes encoding structural ECM glycoproteins'
0.0	6.1	NABA_ECM_REGULATORS	b'Genes encoding enzymes and their regulators involved in the remodeling of the extracellular matrix'
0.1	3.4	PID_ALK1_PATHWAY	b'ALK1 signaling events'
0.1	2.9	PID_TRAIL_PATHWAY	b'TRAIL signaling pathway'
0.1	2.5	PID_P38_MKK3_6PATHWAY	b'p38 MAPK signaling pathway'
0.1	2.2	PID_INTEGRIN2_PATHWAY	b'Beta2 integrin cell surface interactions'
0.1	2.2	PID_P38_ALPHA_BETA_PATHWAY	b'Regulation of p38-alpha and p38-beta'
0.0	2.2	PID_NCADHERIN_PATHWAY	b'N-cadherin signaling events'
0.0	2.1	PID_AURORA_A_PATHWAY	b'Aurora A signaling'
0.1	2.0	NABA_PROTEOGLYCANS	b'Genes encoding proteoglycans'
Showing 1 to 10 of 85 entries
Previous
1
2
3
4
5
…
9
Next
Gene overrepresentation in C2:CP:REACTOME category:
Search:
Show 102550100 entries
Log-likelihood per target	Total log-likelihood	Term	Description
0.1	3.6	REACTOME_INTERFERON_ALPHA_BETA_SIGNALING	b'Genes involved in Interferon alpha/beta signaling'
0.2	3.4	REACTOME_INTRINSIC_PATHWAY	b'Genes involved in Intrinsic Pathway'
0.1	3.3	REACTOME_IMMUNOREGULATORY_INTERACTIONS_BETWEEN_A_LYMPHOID_AND_A_NON_LYMPHOID_CELL	b'Genes involved in Immunoregulatory interactions between a Lymphoid and a non-Lymphoid cell'
0.1	3.1	REACTOME_MYOGENESIS	b'Genes involved in Myogenesis'
0.0	3.1	REACTOME_SIGNALING_BY_RHO_GTPASES	b'Genes involved in Signaling by Rho GTPases'
0.1	2.9	REACTOME_REGULATION_OF_INSULIN_LIKE_GROWTH_FACTOR_IGF_ACTIVITY_BY_INSULIN_LIKE_GROWTH_FACTOR_BINDING_PROTEINS_IGFBPS	b'Genes involved in Regulation of Insulin-like Growth Factor (IGF) Activity by Insulin-like Growth Factor Binding Proteins (IGFBPs)'
0.1	2.9	REACTOME_ENOS_ACTIVATION_AND_REGULATION	b'Genes involved in eNOS activation and regulation'
0.1	2.2	REACTOME_EXTRINSIC_PATHWAY_FOR_APOPTOSIS	b'Genes involved in Extrinsic Pathway for Apoptosis'
0.1	2.2	REACTOME_DCC_MEDIATED_ATTRACTIVE_SIGNALING	b'Genes involved in DCC mediated attractive signaling'
0.0	2.1	REACTOME_TRANSCRIPTIONAL_REGULATION_OF_WHITE_ADIPOCYTE_DIFFERENTIATION	b'Genes involved in Transcriptional Regulation of White Adipocyte Differentiation'
Showing 1 to 10 of 100 entries
Previous
1
2
3
4
5
…
10
Next

## Sheet: HIC2
Top targets:
Search:
Show 102550100 entries
Promoter	Score	Transcript	Gene	Gene Info
chr11_-_2162468	2.50	ENST00000434045.2	IGF2	insulin-like growth factor 2 (somatomedin A)
chr11_-_2162162	2.30	ENST00000381389.1	IGF2	insulin-like growth factor 2 (somatomedin A)
chr9_+_116225999	2.16	ENST00000317613.6	RGS3	regulator of G-protein signaling 3
chr16_+_66400533	2.14	ENST00000341529.3	CDH5	cadherin 5, type 2 (vascular endothelium)
chr3_+_159570722	2.11	ENST00000482804.1	SCHIP1	schwannomin interacting protein 1
chr22_+_33197683	2.01	ENST00000266085.6	TIMP3	TIMP metallopeptidase inhibitor 3
chr2_-_110873599	1.56	ENST00000427178.1	MALL	mal, T-cell differentiation protein-like
chr17_-_62084241	1.52	ENST00000449662.2	ICAM2	intercellular adhesion molecule 2
chr2_+_69001913	1.50	ENST00000409030.3	ARHGAP25	Rho GTPase activating protein 25
		ENST00000409220.1
chr1_+_10057274	1.43	ENST00000294435.7	RBP7	retinol binding protein 7, cellular
Showing 1 to 10 of 200 entries
Previous
1
2
3
4
5
…
20
Next
Gene Ontology Analysis
Gene overrepresentation in biological_process category:
Search:
Show 102550100 entries
Log-likelihood per target	Total log-likelihood	Term	Description
0.9	7.0	GO:2000467	positive regulation of glycogen (starch) synthase activity(GO:2000467)
0.1	2.9	GO:0043011	myeloid dendritic cell differentiation(GO:0043011)
0.0	2.7	GO:0002479	antigen processing and presentation of exogenous peptide antigen via MHC class I, TAP-dependent(GO:0002479)
0.1	2.5	GO:1901385	regulation of voltage-gated calcium channel activity(GO:1901385)
0.8	2.3	GO:0002730	regulation of dendritic cell cytokine production(GO:0002730)
0.6	2.2	GO:1901491	negative regulation of lymphangiogenesis(GO:1901491)
0.4	2.1	GO:0044856	plasma membrane raft distribution(GO:0044855) plasma membrane raft localization(GO:0044856) plasma membrane raft polarization(GO:0044858) regulation of plasma membrane raft polarization(GO:1903906)
0.2	2.1	GO:1903142	positive regulation of endothelial cell development(GO:1901552) positive regulation of establishment of endothelial barrier(GO:1903142)
0.5	2.0	GO:1903984	positive regulation of TRAIL-activated apoptotic signaling pathway(GO:1903984)
0.1	2.0	GO:0006911	phagocytosis, engulfment(GO:0006911)
Showing 1 to 10 of 374 entries
Previous
1
2
3
4
5
…
38
Next
Gene overrepresentation in cellular_component category:
Search:
Show 102550100 entries
Log-likelihood per target	Total log-likelihood	Term	Description
0.1	6.9	GO:0031093	platelet alpha granule lumen(GO:0031093)
0.0	3.5	GO:0043202	lysosomal lumen(GO:0043202)
0.0	3.2	GO:0005884	actin filament(GO:0005884)
0.0	2.7	GO:0009897	external side of plasma membrane(GO:0009897)
0.0	2.4	GO:0008021	synaptic vesicle(GO:0008021)
0.0	2.4	GO:0005788	endoplasmic reticulum lumen(GO:0005788)
0.3	2.1	GO:0031089	platelet dense granule lumen(GO:0031089)
0.1	2.1	GO:0030478	actin cap(GO:0030478)
0.1	2.1	GO:0000145	exocyst(GO:0000145)
0.1	2.0	GO:0032045	guanyl-nucleotide exchange factor complex(GO:0032045)
Showing 1 to 10 of 146 entries
Previous
1
2
3
4
5
…
15
Next
Gene overrepresentation in molecular_function category:
Search:
Show 102550100 entries
Log-likelihood per target	Total log-likelihood	Term	Description
0.2	7.5	GO:0005179	hormone activity(GO:0005179)
0.0	6.0	GO:0005096	GTPase activator activity(GO:0005096)
0.0	4.4	GO:0003779	actin binding(GO:0003779)
0.3	3.4	GO:0008191	metalloendopeptidase inhibitor activity(GO:0008191)
0.1	2.8	GO:0005031	tumor necrosis factor-activated receptor activity(GO:0005031) death receptor activity(GO:0005035)
0.0	2.6	GO:0001205	transcriptional activator activity, RNA polymerase II distal enhancer sequence-specific binding(GO:0001205)
0.2	2.0	GO:0045159	myosin II binding(GO:0045159)
0.6	1.9	GO:0070320	inward rectifier potassium channel inhibitor activity(GO:0070320)
0.1	1.9	GO:0043325	phosphatidylinositol-3,4-bisphosphate binding(GO:0043325)
0.0	1.9	GO:0005070	SH3/SH2 adaptor activity(GO:0005070)
Showing 1 to 10 of 262 entries
Previous
1
2
3
4
5
…
27
Next
Gene overrepresentation in C2:CP category:
Search:
Show 102550100 entries
Log-likelihood per target	Total log-likelihood	Term	Description
0.1	8.9	PID_AJDISS_2PATHWAY	b'Posttranslational regulation of adherens junction stability and dissassembly'
0.0	5.5	NABA_ECM_REGULATORS	b'Genes encoding enzymes and their regulators involved in the remodeling of the extracellular matrix'
0.1	3.5	PID_EPHRINB_REV_PATHWAY	b'Ephrin B reverse signaling'
0.1	3.3	NABA_BASEMENT_MEMBRANES	b'Genes encoding structural components of basement membranes'
0.0	2.7	PID_TCR_PATHWAY	b'TCR signaling in naïve CD4+ T cells'
0.1	2.6	PID_S1P_S1P2_PATHWAY	b'S1P2 pathway'
0.1	2.5	PID_INTEGRIN2_PATHWAY	b'Beta2 integrin cell surface interactions'
0.1	2.4	PID_HIF1A_PATHWAY	b'Hypoxic and oxygen homeostasis regulation of HIF-1-alpha'
0.0	2.4	PID_HNF3B_PATHWAY	b'FOXA2 and FOXA3 transcription factor networks'
0.1	2.3	PID_NCADHERIN_PATHWAY	b'N-cadherin signaling events'
Showing 1 to 10 of 49 entries
Previous
1
2
3
4
5
Next
Gene overrepresentation in C2:CP:REACTOME category:
Search:
Show 102550100 entries
Log-likelihood per target	Total log-likelihood	Term	Description
0.3	6.7	REACTOME_REGULATION_OF_INSULIN_LIKE_GROWTH_FACTOR_IGF_ACTIVITY_BY_INSULIN_LIKE_GROWTH_FACTOR_BINDING_PROTEINS_IGFBPS	b'Genes involved in Regulation of Insulin-like Growth Factor (IGF) Activity by Insulin-like Growth Factor Binding Proteins (IGFBPs)'
0.1	2.8	REACTOME_CASPASE_MEDIATED_CLEAVAGE_OF_CYTOSKELETAL_PROTEINS	b'Genes involved in Caspase-mediated cleavage of cytoskeletal proteins'
0.0	2.7	REACTOME_VIF_MEDIATED_DEGRADATION_OF_APOBEC3G	b'Genes involved in Vif-mediated degradation of APOBEC3G'
0.1	2.3	REACTOME_IMMUNOREGULATORY_INTERACTIONS_BETWEEN_A_LYMPHOID_AND_A_NON_LYMPHOID_CELL	b'Genes involved in Immunoregulatory interactions between a Lymphoid and a non-Lymphoid cell'
0.0	2.2	REACTOME_REGULATION_OF_HYPOXIA_INDUCIBLE_FACTOR_HIF_BY_OXYGEN	b'Genes involved in Regulation of Hypoxia-inducible Factor (HIF) by Oxygen'
0.1	2.0	REACTOME_HORMONE_SENSITIVE_LIPASE_HSL_MEDIATED_TRIACYLGLYCEROL_HYDROLYSIS	b'Genes involved in Hormone-sensitive lipase (HSL)-mediated triacylglycerol hydrolysis'
0.1	1.9	REACTOME_HS_GAG_DEGRADATION	b'Genes involved in HS-GAG degradation'
0.1	1.7	REACTOME_PLATELET_ADHESION_TO_EXPOSED_COLLAGEN	b'Genes involved in Platelet Adhesion to exposed collagen'
0.0	1.7	REACTOME_THE_ROLE_OF_NEF_IN_HIV1_REPLICATION_AND_DISEASE_PATHOGENESIS	b'Genes involved in The role of Nef in HIV-1 replication and disease pathogenesis'
0.0	1.7	REACTOME_GPVI_MEDIATED_ACTIVATION_CASCADE	b'Genes involved in GPVI-mediated activation cascade'
Showing 1 to 10 of 86 entries
Previous
1
2
3
4
5
…
9
Next

## Sheet: WRNIP1
Top targets:
Search:
Show 102550100 entries
Promoter	Score	Transcript	Gene	Gene Info
chr11_-_2158507	3.27	ENST00000381392.1	IGF2	insulin-like growth factor 2 (somatomedin A)
		ENST00000381395.1
		ENST00000418738.2
chrX_-_107018969	2.84	ENST00000372383.4	TSC22D3	TSC22 domain family, member 3
chr8_-_141467818	2.81	ENST00000389327.3	TRAPPC9	trafficking protein particle complex 9
		ENST00000438773.2
chr11_-_2160180	2.55	ENST00000381406.4	IGF2	insulin-like growth factor 2 (somatomedin A)
chr5_-_141338377	2.36	ENST00000510041.1	PCDH12	protocadherin 12
chr11_+_123301012	2.35	ENST00000533341.1	AP000783.1	Uncharacterized protein
chrX_-_128788914	2.35	ENST00000429967.1	APLN	apelin
		ENST00000307484.6
chr17_+_32582293	2.28	ENST00000580907.1	CCL2	chemokine (C-C motif) ligand 2
		ENST00000225831.4
chrX_-_107019181	2.28	ENST00000315660.4	TSC22D3	TSC22 domain family, member 3
		ENST00000372384.2
		ENST00000502650.1
		ENST00000506724.1
chr1_+_167599330	2.24	ENST00000367854.3	RCSD1	RCSD domain containing 1
		ENST00000361496.3
Showing 1 to 10 of 200 entries
Previous
1
2
3
4
5
…
20
Next
Gene Ontology Analysis
Gene overrepresentation in molecular_function category:
Search:
Show 102550100 entries
Log-likelihood per target	Total log-likelihood	Term	Description
0.1	19.7	GO:0005096	GTPase activator activity(GO:0005096)
0.0	18.5	GO:0003779	actin binding(GO:0003779)
0.4	13.1	GO:0005179	hormone activity(GO:0005179)
0.4	6.8	GO:0071837	HMG box domain binding(GO:0071837)
0.7	6.3	GO:0043426	MRF binding(GO:0043426)
0.1	6.1	GO:0001205	transcriptional activator activity, RNA polymerase II distal enhancer sequence-specific binding(GO:0001205)
0.1	6.0	GO:0005484	SNAP receptor activity(GO:0005484)
0.1	6.0	GO:0030971	receptor tyrosine kinase binding(GO:0030971)
0.1	5.5	GO:0005089	Rho guanyl-nucleotide exchange factor activity(GO:0005089)
0.6	5.3	GO:0005021	vascular endothelial growth factor-activated receptor activity(GO:0005021)
Showing 1 to 10 of 569 entries
Previous
1
2
3
4
5
…
57
Next
Gene overrepresentation in C2:CP category:
Search:
Show 102550100 entries
Log-likelihood per target	Total log-likelihood	Term	Description
0.1	17.9	NABA_ECM_REGULATORS	b'Genes encoding enzymes and their regulators involved in the remodeling of the extracellular matrix'
0.2	11.1	NABA_BASEMENT_MEMBRANES	b'Genes encoding structural components of basement membranes'
0.2	10.2	PID_HIF2PATHWAY	b'HIF-2-alpha transcription factor network'
0.1	8.7	PID_ARF6_TRAFFICKING_PATHWAY	b'Arf6 trafficking events'
0.1	8.5	PID_ILK_PATHWAY	b'Integrin-linked kinase signaling'
0.1	6.6	PID_AVB3_OPN_PATHWAY	b'Osteopontin-mediated events'
0.1	6.2	PID_MAPK_TRK_PATHWAY	b'Trk receptor signaling mediated by the MAPK pathway'
0.0	6.0	NABA_ECM_GLYCOPROTEINS	b'Genes encoding structural ECM glycoproteins'
0.1	5.6	SIG_PIP3_SIGNALING_IN_B_LYMPHOCYTES	b'Genes related to PIP3 signaling in B lymphocytes'
0.2	5.0	ST_INTERLEUKIN_4_PATHWAY	b'Interleukin 4 (IL-4) Pathway'
Showing 1 to 10 of 123 entries
Previous
1
2
3
4
5
…
13
Next
Gene overrepresentation in cellular_component category:
Search:
Show 102550100 entries
Log-likelihood per target	Total log-likelihood	Term	Description
0.0	18.3	GO:0016607	nuclear speck(GO:0016607)
0.2	17.1	GO:0030864	cortical actin cytoskeleton(GO:0030864)
0.2	10.8	GO:0070821	tertiary granule membrane(GO:0070821)
0.1	9.9	GO:0031093	platelet alpha granule lumen(GO:0031093)
0.2	8.3	GO:0031092	platelet alpha granule membrane(GO:0031092)
0.2	7.0	GO:0000145	exocyst(GO:0000145)
0.0	6.2	GO:0005788	endoplasmic reticulum lumen(GO:0005788)
0.1	6.0	GO:0043202	lysosomal lumen(GO:0043202)
0.5	5.4	GO:0097443	sorting endosome(GO:0097443)
0.2	4.8	GO:0031588	nucleotide-activated protein kinase complex(GO:0031588)
Showing 1 to 10 of 338 entries
Previous
1
2
3
4
5
…
34
Next
Gene overrepresentation in C2:CP:REACTOME category:
Search:
Show 102550100 entries
Log-likelihood per target	Total log-likelihood	Term	Description
0.1	10.1	REACTOME_INTEGRIN_CELL_SURFACE_INTERACTIONS	b'Genes involved in Integrin cell surface interactions'
0.2	9.2	REACTOME_ERK_MAPK_TARGETS	b'Genes involved in ERK/MAPK targets'
0.4	9.1	REACTOME_REGULATION_OF_INSULIN_LIKE_GROWTH_FACTOR_IGF_ACTIVITY_BY_INSULIN_LIKE_GROWTH_FACTOR_BINDING_PROTEINS_IGFBPS	b'Genes involved in Regulation of Insulin-like Growth Factor (IGF) Activity by Insulin-like Growth Factor Binding Proteins (IGFBPs)'
0.2	8.9	REACTOME_INTERFERON_ALPHA_BETA_SIGNALING	b'Genes involved in Interferon alpha/beta signaling'
0.1	8.0	REACTOME_TRANSCRIPTIONAL_REGULATION_OF_WHITE_ADIPOCYTE_DIFFERENTIATION	b'Genes involved in Transcriptional Regulation of White Adipocyte Differentiation'
0.2	7.7	REACTOME_CASPASE_MEDIATED_CLEAVAGE_OF_CYTOSKELETAL_PROTEINS	b'Genes involved in Caspase-mediated cleavage of cytoskeletal proteins'
0.2	6.7	REACTOME_DCC_MEDIATED_ATTRACTIVE_SIGNALING	b'Genes involved in DCC mediated attractive signaling'
0.1	6.5	REACTOME_MEMBRANE_TRAFFICKING	b'Genes involved in Membrane Trafficking'
0.2	6.4	REACTOME_TIE2_SIGNALING	b'Genes involved in Tie2 Signaling'
0.0	6.1	REACTOME_SIGNALING_BY_RHO_GTPASES	b'Genes involved in Signaling by Rho GTPases'
Showing 1 to 10 of 144 entries
Previous
1
2
3
4
5
…
15
Next
Gene overrepresentation in biological_process category:
Search:
Show 102550100 entries
Log-likelihood per target	Total log-likelihood	Term	Description
1.0	8.6	GO:0070236	negative regulation of activation-induced cell death of T cells(GO:0070236)
0.2	7.4	GO:0045601	regulation of endothelial cell differentiation(GO:0045601)
0.9	7.2	GO:2000467	positive regulation of glycogen (starch) synthase activity(GO:2000467)
1.5	6.1	GO:0050928	negative regulation of positive chemotaxis(GO:0050928)
0.7	5.6	GO:1902748	positive regulation of lens fiber cell differentiation(GO:1902748)
0.6	5.5	GO:0045602	negative regulation of endothelial cell differentiation(GO:0045602)
0.1	5.5	GO:0042147	retrograde transport, endosome to Golgi(GO:0042147)
0.1	5.3	GO:0071357	type I interferon signaling pathway(GO:0060337) cellular response to type I interferon(GO:0071357)
0.1	5.1	GO:0030032	lamellipodium assembly(GO:0030032)
0.4	5.0	GO:0015871	choline transport(GO:0015871)
Showing 1 to 10 of 1,088 entries
Previous
1
2
3
4
5
…
109
Next

## Sheet: IRF7
Top targets:
Search:
Show 102550100 entries
Promoter	Score	Transcript	Gene	Gene Info
chrX_-_20237059	3.87	ENST00000457145.1	RPS6KA3	ribosomal protein S6 kinase, 90kDa, polypeptide 3
chr10_+_91152303	3.31	ENST00000371804.3	IFIT1	interferon-induced protein with tetratricopeptide repeats 1
chr11_-_2160180	2.99	ENST00000381406.4	IGF2	insulin-like growth factor 2 (somatomedin A)
chr10_+_91061712	2.43	ENST00000371826.3	IFIT2	interferon-induced protein with tetratricopeptide repeats 2
chr6_-_46889694	2.23	ENST00000283296.7	GPR116	G protein-coupled receptor 116
		ENST00000362015.4
		ENST00000456426.2
chr10_-_92681033	2.20	ENST00000371697.3	ANKRD1	ankyrin repeat domain 1 (cardiac muscle)
chr10_+_91092241	1.98	ENST00000371811.4	IFIT3	interferon-induced protein with tetratricopeptide repeats 3
chr4_-_169401628	1.92	ENST00000514748.1	DDX60L	DEAD (Asp-Glu-Ala-Asp) box polypeptide 60-like
		ENST00000512371.1
		ENST00000260184.7
		ENST00000505890.1
		ENST00000511577.1
chr1_+_158979680	1.91	ENST00000368131.4	IFI16	interferon, gamma-inducible protein 16
		ENST00000340979.6
chr15_+_45003675	1.90	ENST00000558401.1	B2M	beta-2-microglobulin
		ENST00000559916.1
		ENST00000544417.1
Showing 1 to 10 of 200 entries
Previous
1
2
3
4
5
…
20
Next
Gene Ontology Analysis
Gene overrepresentation in C2:CP category:
Search:
Show 102550100 entries
Log-likelihood per target	Total log-likelihood	Term	Description
0.1	6.9	SIG_PIP3_SIGNALING_IN_B_LYMPHOCYTES	b'Genes related to PIP3 signaling in B lymphocytes'
0.1	5.2	PID_IL12_2PATHWAY	b'IL12-mediated signaling events'
0.1	5.0	PID_ARF6_TRAFFICKING_PATHWAY	b'Arf6 trafficking events'
0.0	2.9	NABA_ECM_REGULATORS	b'Genes encoding enzymes and their regulators involved in the remodeling of the extracellular matrix'
0.1	2.8	PID_SYNDECAN_4_PATHWAY	b'Syndecan-4-mediated signaling events'
0.0	2.8	PID_AJDISS_2PATHWAY	b'Posttranslational regulation of adherens junction stability and dissassembly'
0.1	2.6	SA_FAS_SIGNALING	b'The TNF-type receptor Fas induces apoptosis on ligand binding.'
0.0	2.4	PID_IL4_2PATHWAY	b'IL4-mediated signaling events'
0.1	1.8	SA_MMP_CYTOKINE_CONNECTION	b'Cytokines can induce activation of matrix metalloproteinases, which degrade extracellular matrix.'
0.1	1.5	SA_CASPASE_CASCADE	b'Apoptosis is mediated by caspases, cysteine proteases arranged in a proteolytic cascade.'
Showing 1 to 10 of 39 entries
Previous
1
2
3
4
Next
Gene overrepresentation in C2:CP:REACTOME category:
Search:
Show 102550100 entries
Log-likelihood per target	Total log-likelihood	Term	Description
0.3	17.9	REACTOME_INTERFERON_ALPHA_BETA_SIGNALING	b'Genes involved in Interferon alpha/beta signaling'
0.1	5.3	REACTOME_CREB_PHOSPHORYLATION_THROUGH_THE_ACTIVATION_OF_RAS	b'Genes involved in CREB phosphorylation through the activation of Ras'
0.0	4.4	REACTOME_PPARA_ACTIVATES_GENE_EXPRESSION	b'Genes involved in PPARA Activates Gene Expression'
0.4	3.3	REACTOME_ENDOSOMAL_VACUOLAR_PATHWAY	b'Genes involved in Endosomal/Vacuolar pathway'
0.1	3.1	REACTOME_INSULIN_SYNTHESIS_AND_PROCESSING	b'Genes involved in Insulin Synthesis and Processing'
0.1	3.0	REACTOME_FORMATION_OF_FIBRIN_CLOT_CLOTTING_CASCADE	b'Genes involved in Formation of Fibrin Clot (Clotting Cascade)'
0.1	2.7	REACTOME_REGULATION_OF_INSULIN_LIKE_GROWTH_FACTOR_IGF_ACTIVITY_BY_INSULIN_LIKE_GROWTH_FACTOR_BINDING_PROTEINS_IGFBPS	b'Genes involved in Regulation of Insulin-like Growth Factor (IGF) Activity by Insulin-like Growth Factor Binding Proteins (IGFBPs)'
0.1	2.6	REACTOME_EXTRINSIC_PATHWAY_FOR_APOPTOSIS	b'Genes involved in Extrinsic Pathway for Apoptosis'
0.1	2.1	REACTOME_CHEMOKINE_RECEPTORS_BIND_CHEMOKINES	b'Genes involved in Chemokine receptors bind chemokines'
0.1	1.5	REACTOME_CASPASE_MEDIATED_CLEAVAGE_OF_CYTOSKELETAL_PROTEINS	b'Genes involved in Caspase-mediated cleavage of cytoskeletal proteins'
Showing 1 to 10 of 45 entries
Previous
1
2
3
4
5
Next
Gene overrepresentation in cellular_component category:
Search:
Show 102550100 entries
Log-likelihood per target	Total log-likelihood	Term	Description
0.0	4.5	GO:0031225	anchored component of membrane(GO:0031225)
0.0	2.8	GO:0031093	platelet alpha granule lumen(GO:0031093)
0.1	2.6	GO:0031265	CD95 death-inducing signaling complex(GO:0031265)
0.2	2.5	GO:0034385	very-low-density lipoprotein particle(GO:0034361) triglyceride-rich lipoprotein particle(GO:0034385)
0.1	2.4	GO:0000145	exocyst(GO:0000145)
0.0	2.2	GO:0030666	endocytic vesicle membrane(GO:0030666)
0.5	1.9	GO:0031905	early endosome lumen(GO:0031905)
0.0	1.7	GO:0005811	lipid particle(GO:0005811)
0.0	1.7	GO:0043202	lysosomal lumen(GO:0043202)
0.4	1.5	GO:0008537	proteasome activator complex(GO:0008537)
Showing 1 to 10 of 77 entries
Previous
1
2
3
4
5
…
8
Next
Gene overrepresentation in biological_process category:
Search:
Show 102550100 entries
Log-likelihood per target	Total log-likelihood	Term	Description
0.4	5.7	GO:0035457	cellular response to interferon-alpha(GO:0035457)
0.2	5.5	GO:0043555	regulation of translation in response to stress(GO:0043555)
0.1	4.2	GO:0032731	positive regulation of interleukin-1 beta production(GO:0032731)
0.0	3.7	GO:0060337	type I interferon signaling pathway(GO:0060337) cellular response to type I interferon(GO:0071357)
0.3	3.6	GO:0018377	protein myristoylation(GO:0018377)
1.1	3.3	GO:0051097	negative regulation of helicase activity(GO:0051097)
0.5	3.2	GO:0007598	blood coagulation, extrinsic pathway(GO:0007598)
0.4	3.1	GO:0045629	negative regulation of T-helper 2 cell differentiation(GO:0045629)
0.4	3.0	GO:2000467	positive regulation of glycogen (starch) synthase activity(GO:2000467)
0.2	3.0	GO:0019835	cytolysis(GO:0019835)
Showing 1 to 10 of 191 entries
Previous
1
2
3
4
5
…
20
Next
Gene overrepresentation in molecular_function category:
Search:
Show 102550100 entries
Log-likelihood per target	Total log-likelihood	Term	Description
0.6	7.0	GO:0001730	2'-5'-oligoadenylate synthetase activity(GO:0001730)
0.1	5.0	GO:0043027	cysteine-type endopeptidase inhibitor activity involved in apoptotic process(GO:0043027)
0.0	4.1	GO:0001047	core promoter binding(GO:0001047)
0.1	4.0	GO:0097200	cysteine-type endopeptidase activity involved in execution phase of apoptosis(GO:0097200)
0.0	3.7	GO:0003705	transcription factor activity, RNA polymerase II distal enhancer sequence-specific binding(GO:0003705)
0.1	3.4	GO:0004867	serine-type endopeptidase inhibitor activity(GO:0004867)
0.1	3.3	GO:0005179	hormone activity(GO:0005179)
0.1	3.2	GO:0003950	NAD+ ADP-ribosyltransferase activity(GO:0003950)
0.0	2.9	GO:0000979	RNA polymerase II core promoter sequence-specific DNA binding(GO:0000979)
0.0	2.8	GO:0005254	chloride channel activity(GO:0005254)
Showing 1 to 10 of 138 entries
Previous
1
2
3
4
5
…
14
Next

## Sheet: SPI1
Top targets:
Search:
Show 102550100 entries
Promoter	Score	Transcript	Gene	Gene Info
chr3_+_119013185	3.31	ENST00000264245.4	ARHGAP31	Rho GTPase activating protein 31
chr12_+_52306113	3.24	ENST00000547400.1	ACVRL1	activin A receptor type II-like 1
		ENST00000550683.1
		ENST00000419526.2
chr2_+_233924548	3.08	ENST00000422935.1	INPP5D	inositol polyphosphate-5-phosphatase, 145kDa
chr2_+_233925038	2.96	ENST00000451407.1	INPP5D	inositol polyphosphate-5-phosphatase, 145kDa
chr2_+_161993412	2.47	ENST00000259075.2	TANK	TRAF family member-associated NFKB activator
		ENST00000432002.1
chr5_+_61874562	2.40	ENST00000334994.5	LRRC70	leucine rich repeat containing 70
		ENST00000409534.1	IPO11	importin 11
chr2_+_169658928	2.39	ENST00000317647.7	NOSTRIN	nitric oxide synthase trafficking
		ENST00000445023.2
chr5_-_88179017	2.32	ENST00000514028.1	MEF2C	myocyte enhancer factor 2C
		ENST00000514015.1
		ENST00000503075.1
		ENST00000437473.2
chr9_+_120466610	2.30	ENST00000394487.4	TLR4	toll-like receptor 4
chr2_+_198669365	2.19	ENST00000428675.1	PLCL1	phospholipase C-like 1
Showing 1 to 10 of 200 entries
Previous
1
2
3
4
5
…
20
Next
Gene Ontology Analysis
Gene overrepresentation in cellular_component category:
Search:
Show 102550100 entries
Log-likelihood per target	Total log-likelihood	Term	Description
0.0	7.7	GO:0030027	lamellipodium(GO:0030027)
0.2	5.5	GO:0000145	exocyst(GO:0000145)
0.0	5.4	GO:0045121	membrane raft(GO:0045121) membrane microdomain(GO:0098857)
0.8	4.2	GO:0046696	lipopolysaccharide receptor complex(GO:0046696)
0.1	3.6	GO:0070821	tertiary granule membrane(GO:0070821)
0.1	2.8	GO:0032045	guanyl-nucleotide exchange factor complex(GO:0032045)
0.0	2.8	GO:0030666	endocytic vesicle membrane(GO:0030666)
0.1	2.6	GO:0071564	npBAF complex(GO:0071564)
0.4	2.1	GO:0036398	TCR signalosome(GO:0036398)
0.1	2.1	GO:0070938	contractile ring(GO:0070938)
Showing 1 to 10 of 103 entries
Previous
1
2
3
4
5
…
11
Next
Gene overrepresentation in C2:CP category:
Search:
Show 102550100 entries
Log-likelihood per target	Total log-likelihood	Term	Description
0.2	6.8	ST_INTERLEUKIN_4_PATHWAY	b'Interleukin 4 (IL-4) Pathway'
0.1	5.2	PID_CASPASE_PATHWAY	b'Caspase cascade in apoptosis'
0.1	5.1	PID_MAPK_TRK_PATHWAY	b'Trk receptor signaling mediated by the MAPK pathway'
0.0	5.1	PID_AR_PATHWAY	b'Coregulation of Androgen receptor activity'
0.1	4.1	PID_AR_TF_PATHWAY	b'Regulation of Androgen receptor activity'
0.2	4.0	PID_TOLL_ENDOGENOUS_PATHWAY	b'Endogenous TLR signaling'
0.1	3.7	PID_ALK1_PATHWAY	b'ALK1 signaling events'
0.1	3.6	PID_FCER1_PATHWAY	b'Fc-epsilon receptor I signaling in mast cells'
0.1	3.2	PID_IL23_PATHWAY	b'IL23-mediated signaling events'
0.0	3.1	PID_HDAC_CLASSI_PATHWAY	b'Signaling events mediated by HDAC Class I'
Showing 1 to 10 of 53 entries
Previous
1
2
3
4
5
6
Next
Gene overrepresentation in molecular_function category:
Search:
Show 102550100 entries
Log-likelihood per target	Total log-likelihood	Term	Description
1.3	6.5	GO:0016314	phosphatidylinositol-3,4,5-trisphosphate 3-phosphatase activity(GO:0016314)
0.3	5.7	GO:0071837	HMG box domain binding(GO:0071837)
0.6	5.6	GO:0005094	Rho GDP-dissociation inhibitor activity(GO:0005094)
0.3	4.8	GO:0001011	transcription factor activity, sequence-specific DNA binding, RNA polymerase recruiting(GO:0001011) transcription factor activity, TFIIB-class binding(GO:0001087)
0.0	4.5	GO:0017124	SH3 domain binding(GO:0017124)
0.6	4.4	GO:0035800	deubiquitinase activator activity(GO:0035800)
0.6	4.2	GO:0001875	lipopolysaccharide receptor activity(GO:0001875)
0.6	3.9	GO:0098821	BMP receptor activity(GO:0098821)
0.0	3.6	GO:0000980	RNA polymerase II distal enhancer sequence-specific DNA binding(GO:0000980)
0.4	3.0	GO:0070679	inositol 1,4,5 trisphosphate binding(GO:0070679)
Showing 1 to 10 of 155 entries
Previous
1
2
3
4
5
…
16
Next
Gene overrepresentation in C2:CP:REACTOME category:
Search:
Show 102550100 entries
Log-likelihood per target	Total log-likelihood	Term	Description
0.1	13.9	REACTOME_SIGNALING_BY_RHO_GTPASES	b'Genes involved in Signaling by Rho GTPases'
0.2	10.5	REACTOME_MYOGENESIS	b'Genes involved in Myogenesis'
0.2	4.8	REACTOME_TRAF6_MEDIATED_IRF7_ACTIVATION	b'Genes involved in TRAF6 mediated IRF7 activation'
0.5	3.7	REACTOME_IKK_COMPLEX_RECRUITMENT_MEDIATED_BY_RIP1	b'Genes involved in IKK complex recruitment mediated by RIP1'
0.1	3.0	REACTOME_P38MAPK_EVENTS	b'Genes involved in p38MAPK events'
0.1	2.9	REACTOME_ERK_MAPK_TARGETS	b'Genes involved in ERK/MAPK targets'
0.1	2.4	REACTOME_ENOS_ACTIVATION_AND_REGULATION	b'Genes involved in eNOS activation and regulation'
0.0	2.4	REACTOME_NOTCH1_INTRACELLULAR_DOMAIN_REGULATES_TRANSCRIPTION	b'Genes involved in NOTCH1 Intracellular Domain Regulates Transcription'
0.1	2.0	REACTOME_CHEMOKINE_RECEPTORS_BIND_CHEMOKINES	b'Genes involved in Chemokine receptors bind chemokines'
0.2	1.9	REACTOME_ENDOSOMAL_VACUOLAR_PATHWAY	b'Genes involved in Endosomal/Vacuolar pathway'
Showing 1 to 10 of 57 entries
Previous
1
2
3
4
5
6
Next
Gene overrepresentation in biological_process category:
Search:
Show 102550100 entries
Log-likelihood per target	Total log-likelihood	Term	Description
1.3	6.5	GO:0045659	regulation of neutrophil differentiation(GO:0045658) negative regulation of neutrophil differentiation(GO:0045659)
0.8	5.6	GO:0071461	cellular response to redox state(GO:0071461)
0.0	5.1	GO:0006367	transcription initiation from RNA polymerase II promoter(GO:0006367)
0.7	4.9	GO:0003138	primary heart field specification(GO:0003138) sinoatrial valve development(GO:0003172) sinoatrial valve morphogenesis(GO:0003185) muscle cell fate determination(GO:0007521) regulation of synaptic activity(GO:0060025)
0.4	4.8	GO:0090500	endocardial cushion to mesenchymal transition(GO:0090500)
0.6	4.4	GO:2000158	positive regulation of ubiquitin-specific protease activity(GO:2000158)
1.4	4.2	GO:0045416	regulation of dendritic cell cytokine production(GO:0002730) negative regulation of interleukin-23 production(GO:0032707) positive regulation of interleukin-8 biosynthetic process(GO:0045416)
0.3	3.5	GO:1900122	positive regulation of receptor binding(GO:1900122)
0.0	3.4	GO:0038094	immune response-regulating cell surface receptor signaling pathway involved in phagocytosis(GO:0002433) Fc-gamma receptor signaling pathway(GO:0038094) Fc-gamma receptor signaling pathway involved in phagocytosis(GO:0038096)
0.4	3.2	GO:0070236	negative regulation of activation-induced cell death of T cells(GO:0070236)
Showing 1 to 10 of 235 entries
Previous
1
2
3
4
5
…
24
Next

## Sheet: ERG
Top targets:
Search:
Show 102550100 entries
Promoter	Score	Transcript	Gene	Gene Info
chr5_+_61874562	5.34	ENST00000334994.5	LRRC70	leucine rich repeat containing 70
		ENST00000409534.1	IPO11	importin 11
chr14_-_38725573	4.06	ENST00000342213.2	CLEC14A	C-type lectin domain family 14, member A
chr6_+_144665237	3.66	ENST00000421035.2	UTRN	utrophin
chrX_-_128788914	2.92	ENST00000429967.1	APLN	apelin
		ENST00000307484.6
chr12_-_6233828	2.56	ENST00000572068.1	VWF	von Willebrand factor
		ENST00000261405.5
chr22_+_27068704	2.40	ENST00000444388.1	CTA-211A9.5	CTA-211A9.5
		ENST00000450963.1
		ENST00000449017.1
chr1_+_40506255	2.30	ENST00000421589.1	CAP1	CAP, adenylate cyclase-associated protein 1 (yeast)
chr1_+_169337412	2.29	ENST00000426663.1	BLZF1	basic leucine zipper nuclear factor 1
chr12_-_105629852	2.28	ENST00000551662.1	APPL2	adaptor protein, phosphotyrosine interaction, PH domain and leucine zipper containing 2
		ENST00000553097.1
chr1_+_10003486	2.27	ENST00000403197.1	NMNAT1	nicotinamide nucleotide adenylyltransferase 1
		ENST00000377205.1
Showing 1 to 10 of 200 entries
Previous
1
2
3
4
5
…
20
Next
Gene Ontology Analysis
Gene overrepresentation in molecular_function category:
Search:
Show 102550100 entries
Log-likelihood per target	Total log-likelihood	Term	Description
0.0	13.6	GO:0005096	GTPase activator activity(GO:0005096)
0.0	6.7	GO:0019001	guanyl nucleotide binding(GO:0019001)
0.0	6.6	GO:0005089	Rho guanyl-nucleotide exchange factor activity(GO:0005089)
0.7	6.1	GO:0005149	interleukin-1 receptor binding(GO:0005149)
0.1	6.0	GO:0005178	integrin binding(GO:0005178)
0.2	5.8	GO:0080025	phosphatidylinositol-3,5-bisphosphate binding(GO:0080025)
0.0	5.6	GO:0051015	actin filament binding(GO:0051015)
0.0	4.5	GO:0031625	ubiquitin protein ligase binding(GO:0031625)
1.1	4.3	GO:1990430	extracellular matrix protein binding(GO:1990430)
0.4	4.0	GO:0005094	Rho GDP-dissociation inhibitor activity(GO:0005094)
Showing 1 to 10 of 401 entries
Previous
1
2
3
4
5
…
41
Next
Gene overrepresentation in C2:CP:REACTOME category:
Search:
Show 102550100 entries
Log-likelihood per target	Total log-likelihood	Term	Description
0.1	16.1	REACTOME_SIGNALING_BY_RHO_GTPASES	b'Genes involved in Signaling by Rho GTPases'
0.1	5.9	REACTOME_INTEGRIN_CELL_SURFACE_INTERACTIONS	b'Genes involved in Integrin cell surface interactions'
0.3	5.0	REACTOME_HYALURONAN_UPTAKE_AND_DEGRADATION	b'Genes involved in Hyaluronan uptake and degradation'
0.3	4.8	REACTOME_SEMA3A_PLEXIN_REPULSION_SIGNALING_BY_INHIBITING_INTEGRIN_ADHESION	b'Genes involved in SEMA3A-Plexin repulsion signaling by inhibiting Integrin adhesion'
0.2	4.6	REACTOME_EXTRINSIC_PATHWAY_FOR_APOPTOSIS	b'Genes involved in Extrinsic Pathway for Apoptosis'
0.3	4.3	REACTOME_PLATELET_ADHESION_TO_EXPOSED_COLLAGEN	b'Genes involved in Platelet Adhesion to exposed collagen'
0.0	3.9	REACTOME_TRANSCRIPTIONAL_REGULATION_OF_WHITE_ADIPOCYTE_DIFFERENTIATION	b'Genes involved in Transcriptional Regulation of White Adipocyte Differentiation'
0.2	3.6	REACTOME_REGULATED_PROTEOLYSIS_OF_P75NTR	b'Genes involved in Regulated proteolysis of p75NTR'
0.1	3.5	REACTOME_MYOGENESIS	b'Genes involved in Myogenesis'
0.1	3.4	REACTOME_INTERFERON_GAMMA_SIGNALING	b'Genes involved in Interferon gamma signaling'
Showing 1 to 10 of 118 entries
Previous
1
2
3
4
5
…
12
Next
Gene overrepresentation in cellular_component category:
Search:
Show 102550100 entries
Log-likelihood per target	Total log-likelihood	Term	Description
0.1	12.6	GO:0030864	cortical actin cytoskeleton(GO:0030864)
0.0	9.7	GO:0030027	lamellipodium(GO:0030027)
0.0	6.6	GO:0005578	proteinaceous extracellular matrix(GO:0005578)
0.2	5.9	GO:0070971	endoplasmic reticulum exit site(GO:0070971)
0.1	5.8	GO:0090545	NuRD complex(GO:0016581) CHD-type complex(GO:0090545)
0.0	5.8	GO:0016607	nuclear speck(GO:0016607)
0.4	5.3	GO:0000322	storage vacuole(GO:0000322)
0.1	5.0	GO:0070821	tertiary granule membrane(GO:0070821)
0.2	4.7	GO:0097342	ripoptosome(GO:0097342)
0.0	4.1	GO:0005788	endoplasmic reticulum lumen(GO:0005788)
Showing 1 to 10 of 257 entries
Previous
1
2
3
4
5
…
26
Next
Gene overrepresentation in C2:CP category:
Search:
Show 102550100 entries
Log-likelihood per target	Total log-likelihood	Term	Description
0.1	8.9	NABA_ECM_REGULATORS	b'Genes encoding enzymes and their regulators involved in the remodeling of the extracellular matrix'
0.1	8.8	PID_AURORA_A_PATHWAY	b'Aurora A signaling'
0.1	8.2	PID_CASPASE_PATHWAY	b'Caspase cascade in apoptosis'
0.1	8.0	NABA_ECM_GLYCOPROTEINS	b'Genes encoding structural ECM glycoproteins'
0.1	7.1	PID_ARF6_TRAFFICKING_PATHWAY	b'Arf6 trafficking events'
0.1	6.9	PID_FAK_PATHWAY	b'Signaling events mediated by focal adhesion kinase'
0.2	5.6	PID_IL23_PATHWAY	b'IL23-mediated signaling events'
0.0	5.3	NABA_ECM_AFFILIATED	b'Genes encoding proteins affiliated structurally or functionally to extracellular matrix proteins'
0.1	5.1	SIG_INSULIN_RECEPTOR_PATHWAY_IN_CARDIAC_MYOCYTES	b'Genes related to the insulin receptor pathway'
0.1	4.8	PID_FCER1_PATHWAY	b'Fc-epsilon receptor I signaling in mast cells'
Showing 1 to 10 of 85 entries
Previous
1
2
3
4
5
…
9
Next
Gene overrepresentation in biological_process category:
Search:
Show 102550100 entries
Log-likelihood per target	Total log-likelihood	Term	Description
0.3	5.3	GO:0006610	ribosomal protein import into nucleus(GO:0006610)
0.4	5.1	GO:0060124	positive regulation of growth hormone secretion(GO:0060124)
0.7	4.2	GO:0039663	fusion of virus membrane with host plasma membrane(GO:0019064) membrane fusion involved in viral entry into host cell(GO:0039663) multi-organism membrane fusion(GO:0044800)
0.6	4.0	GO:0071461	cellular response to redox state(GO:0071461)
0.3	3.7	GO:0014877	response to muscle inactivity involved in regulation of muscle adaptation(GO:0014877) response to denervation involved in regulation of muscle adaptation(GO:0014894)
0.1	3.6	GO:0032731	positive regulation of interleukin-1 beta production(GO:0032731)
0.4	3.4	GO:1904327	protein localization to cytosolic proteasome complex(GO:1904327) protein localization to cytosolic proteasome complex involved in ERAD pathway(GO:1904379)
0.7	3.3	GO:0061552	vestibulocochlear nerve structural organization(GO:0021649) positive regulation of cytokine activity(GO:0060301) ganglion morphogenesis(GO:0061552) sensory neuron axon guidance(GO:0097374) VEGF-activated neuropilin signaling pathway involved in axon guidance(GO:1902378) dorsal root ganglion morphogenesis(GO:1904835) otic placode development(GO:1905040)
0.1	3.2	GO:0007190	activation of adenylate cyclase activity(GO:0007190)
0.0	3.2	GO:0008277	regulation of G-protein coupled receptor protein signaling pathway(GO:0008277)
Showing 1 to 10 of 662 entries
Previous
1
2
3
4
5
…
67
Next

## Sheet: MEIS2
Top targets:
Search:
Show 102550100 entries
Promoter	Score	Transcript	Gene	Gene Info
chr5_+_66124590	3.98	ENST00000490016.2	MAST4	microtubule associated serine/threonine kinase family member 4
		ENST00000403666.1
		ENST00000450827.1
chr15_+_57884086	3.80	ENST00000380569.2	GCOM1	GRINL1A complex locus 1
		ENST00000380561.2
		ENST00000574161.1
		ENST00000572390.1
		ENST00000396180.1
		ENST00000380560.2
chr7_-_15726296	3.27	ENST00000262041.5	MEOX2	mesenchyme homeobox 2
chr2_+_169658928	3.26	ENST00000317647.7	NOSTRIN	nitric oxide synthase trafficking
		ENST00000445023.2
chr8_-_13372395	3.15	ENST00000276297.4	DLC1	deleted in liver cancer 1
		ENST00000511869.1
chr3_-_172241250	3.11	ENST00000420541.2	TNFSF10	tumor necrosis factor (ligand) superfamily, member 10
		ENST00000241261.2
chr6_-_11382478	2.96	ENST00000397378.3	NEDD9	neural precursor cell expressed, developmentally down-regulated 9
		ENST00000513989.1
		ENST00000508546.1
		ENST00000504387.1
chr4_-_88450511	2.94	ENST00000458304.2	SPARCL1	SPARC-like 1 (hevin)
chr19_-_43032532	2.91	ENST00000403461.1	CEACAM1	carcinoembryonic antigen-related cell adhesion molecule 1 (biliary glycoprotein)
		ENST00000352591.5
		ENST00000358394.3
		ENST00000403444.3
		ENST00000308072.4
		ENST00000599389.1
		ENST00000351134.3
		ENST00000161559.6
chr4_-_88450595	2.84	ENST00000434434.1	SPARCL1	SPARC-like 1 (hevin)
Showing 1 to 10 of 200 entries
Previous
1
2
3
4
5
…
20
Next
Gene Ontology Analysis
Gene overrepresentation in C2:CP category:
Search:
Show 102550100 entries
Log-likelihood per target	Total log-likelihood	Term	Description
0.1	20.2	NABA_ECM_GLYCOPROTEINS	b'Genes encoding structural ECM glycoproteins'
0.2	9.1	PID_TRAIL_PATHWAY	b'TRAIL signaling pathway'
0.1	6.5	PID_RHOA_REG_PATHWAY	b'Regulation of RhoA activity'
0.1	6.0	PID_AR_TF_PATHWAY	b'Regulation of Androgen receptor activity'
0.3	5.1	PID_VEGF_VEGFR_PATHWAY	b'VEGF and VEGFR signaling network'
0.1	5.1	ST_PHOSPHOINOSITIDE_3_KINASE_PATHWAY	b'PI3K Pathway'
0.1	4.2	PID_INSULIN_PATHWAY	b'Insulin Pathway'
0.1	4.2	PID_ALPHA_SYNUCLEIN_PATHWAY	b'Alpha-synuclein signaling'
0.1	4.1	PID_ERBB1_INTERNALIZATION_PATHWAY	b'Internalization of ErbB1'
0.1	4.0	PID_IL1_PATHWAY	b'IL1-mediated signaling events'
Showing 1 to 10 of 97 entries
Previous
1
2
3
4
5
…
10
Next
Gene overrepresentation in molecular_function category:
Search:
Show 102550100 entries
Log-likelihood per target	Total log-likelihood	Term	Description
0.3	15.9	GO:0050840	extracellular matrix binding(GO:0050840)
0.0	11.5	GO:0005096	GTPase activator activity(GO:0005096)
0.2	6.9	GO:0008093	cytoskeletal adaptor activity(GO:0008093)
0.3	6.6	GO:0071949	FAD binding(GO:0071949)
0.0	6.5	GO:0003779	actin binding(GO:0003779)
0.0	6.3	GO:0005525	GTP binding(GO:0005525)
0.6	5.5	GO:0005021	vascular endothelial growth factor-activated receptor activity(GO:0005021)
0.2	5.4	GO:0005521	lamin binding(GO:0005521)
0.1	4.9	GO:0043027	cysteine-type endopeptidase inhibitor activity involved in apoptotic process(GO:0043027)
0.1	4.7	GO:0001105	RNA polymerase II transcription coactivator activity(GO:0001105)
Showing 1 to 10 of 428 entries
Previous
1
2
3
4
5
…
43
Next
Gene overrepresentation in cellular_component category:
Search:
Show 102550100 entries
Log-likelihood per target	Total log-likelihood	Term	Description
0.1	13.6	GO:0030027	lamellipodium(GO:0030027)
0.0	12.0	GO:0005578	proteinaceous extracellular matrix(GO:0005578)
0.1	9.2	GO:0030864	cortical actin cytoskeleton(GO:0030864)
0.2	6.4	GO:0031092	platelet alpha granule membrane(GO:0031092)
0.1	5.8	GO:0043202	lysosomal lumen(GO:0043202)
0.0	5.8	GO:0031901	early endosome membrane(GO:0031901)
0.5	5.7	GO:0097443	sorting endosome(GO:0097443)
0.2	5.2	GO:0016514	SWI/SNF complex(GO:0016514)
0.0	5.1	GO:0016607	nuclear speck(GO:0016607)
0.2	4.6	GO:0000145	exocyst(GO:0000145)
Showing 1 to 10 of 264 entries
Previous
1
2
3
4
5
…
27
Next
Gene overrepresentation in C2:CP:REACTOME category:
Search:
Show 102550100 entries
Log-likelihood per target	Total log-likelihood	Term	Description
0.1	11.0	REACTOME_SIGNALING_BY_RHO_GTPASES	b'Genes involved in Signaling by Rho GTPases'
0.2	7.4	REACTOME_ERK_MAPK_TARGETS	b'Genes involved in ERK/MAPK targets'
0.1	6.9	REACTOME_INTERFERON_ALPHA_BETA_SIGNALING	b'Genes involved in Interferon alpha/beta signaling'
0.2	5.6	REACTOME_EXTRINSIC_PATHWAY_FOR_APOPTOSIS	b'Genes involved in Extrinsic Pathway for Apoptosis'
0.1	5.2	REACTOME_TRANSCRIPTIONAL_REGULATION_OF_WHITE_ADIPOCYTE_DIFFERENTIATION	b'Genes involved in Transcriptional Regulation of White Adipocyte Differentiation'
0.3	5.1	REACTOME_VEGF_LIGAND_RECEPTOR_INTERACTIONS	b'Genes involved in VEGF ligand-receptor interactions'
0.2	4.5	REACTOME_TRAF6_MEDIATED_IRF7_ACTIVATION	b'Genes involved in TRAF6 mediated IRF7 activation'
0.1	4.2	REACTOME_MYOGENESIS	b'Genes involved in Myogenesis'
0.3	4.0	REACTOME_HYALURONAN_UPTAKE_AND_DEGRADATION	b'Genes involved in Hyaluronan uptake and degradation'
0.0	3.8	REACTOME_MHC_CLASS_II_ANTIGEN_PRESENTATION	b'Genes involved in MHC class II antigen presentation'
Showing 1 to 10 of 121 entries
Previous
1
2
3
4
5
…
13
Next
Gene overrepresentation in biological_process category:
Search:
Show 102550100 entries
Log-likelihood per target	Total log-likelihood	Term	Description
0.2	6.6	GO:0000188	inactivation of MAPK activity(GO:0000188)
0.1	5.9	GO:0048278	vesicle docking(GO:0048278)
1.1	5.5	GO:1904835	vestibulocochlear nerve structural organization(GO:0021649) positive regulation of cytokine activity(GO:0060301) ganglion morphogenesis(GO:0061552) sensory neuron axon guidance(GO:0097374) VEGF-activated neuropilin signaling pathway involved in axon guidance(GO:1902378) dorsal root ganglion morphogenesis(GO:1904835) otic placode development(GO:1905040)
0.1	5.3	GO:0003298	physiological muscle hypertrophy(GO:0003298) physiological cardiac muscle hypertrophy(GO:0003301) cell growth involved in cardiac muscle cell development(GO:0061049)
0.8	4.7	GO:0060161	positive regulation of dopamine receptor signaling pathway(GO:0060161)
0.1	4.6	GO:0060333	interferon-gamma-mediated signaling pathway(GO:0060333)
0.3	4.5	GO:0046007	negative regulation of activated T cell proliferation(GO:0046007)
1.5	4.4	GO:0019417	sulfur oxidation(GO:0019417)
0.1	4.1	GO:0030574	collagen catabolic process(GO:0030574)
0.2	4.0	GO:0035372	protein localization to microtubule(GO:0035372)
Showing 1 to 10 of 691 entries
Previous
1
2
3
4
5
…
70
Next

## Sheet: IRF2
Top targets:
Search:
Show 102550100 entries
Promoter	Score	Transcript	Gene	Gene Info
chr1_+_79086088	8.30	ENST00000370751.5	IFI44L	interferon-induced protein 44-like
		ENST00000342282.3
chr10_+_91092241	6.91	ENST00000371811.4	IFIT3	interferon-induced protein with tetratricopeptide repeats 3
chr10_+_91087651	6.82	ENST00000371818.4	IFIT3	interferon-induced protein with tetratricopeptide repeats 3
chr10_+_91152303	6.45	ENST00000371804.3	IFIT1	interferon-induced protein with tetratricopeptide repeats 1
chr2_-_7005785	5.96	ENST00000256722.5	CMPK2	cytidine monophosphate (UMP-CMP) kinase 2, mitochondrial
		ENST00000404168.1
		ENST00000458098.1
chr4_-_169239921	5.52	ENST00000514995.1	DDX60	DEAD (Asp-Glu-Ala-Asp) box polypeptide 60
		ENST00000393743.3
chr12_+_113416191	5.28	ENST00000342315.4	OAS2	2'-5'-oligoadenylate synthetase 2, 69/71kDa
		ENST00000392583.2
chr19_+_17516531	5.20	ENST00000528911.1	MVB12A	multivesicular body subunit 12A
		ENST00000528604.1	CTD-2521M24.9	CTD-2521M24.9
		ENST00000595892.1
		ENST00000500836.2
		ENST00000598546.1
		ENST00000600369.1
		ENST00000598356.1
		ENST00000594426.1
chr17_-_4643161	5.18	ENST00000574412.1	CXCL16	chemokine (C-X-C motif) ligand 16
chr17_+_6659153	4.89	ENST00000441631.1	XAF1	XIAP associated factor 1
		ENST00000438512.1
		ENST00000346752.4
		ENST00000361842.3
Showing 1 to 10 of 200 entries
Previous
1
2
3
4
5
…
20
Next
Gene Ontology Analysis
Gene overrepresentation in biological_process category:
Search:
Show 102550100 entries
Log-likelihood per target	Total log-likelihood	Term	Description
1.4	18.1	GO:0035457	cellular response to interferon-alpha(GO:0035457)
1.2	13.0	GO:0018377	protein myristoylation(GO:0018377)
1.0	12.3	GO:1903943	regulation of hepatocyte apoptotic process(GO:1903943) negative regulation of hepatocyte apoptotic process(GO:1903944)
1.1	9.5	GO:0070212	protein poly-ADP-ribosylation(GO:0070212)
0.3	9.5	GO:0032731	positive regulation of interleukin-1 beta production(GO:0032731)
1.9	7.4	GO:0034154	toll-like receptor 7 signaling pathway(GO:0034154)
0.0	7.1	GO:0051607	defense response to virus(GO:0051607)
0.7	6.8	GO:0010818	T cell chemotaxis(GO:0010818)
0.8	6.7	GO:0072643	interferon-gamma secretion(GO:0072643)
2.1	6.4	GO:0051097	negative regulation of helicase activity(GO:0051097)
Showing 1 to 10 of 237 entries
Previous
1
2
3
4
5
…
24
Next
Gene overrepresentation in molecular_function category:
Search:
Show 102550100 entries
Log-likelihood per target	Total log-likelihood	Term	Description
2.0	22.4	GO:0001730	2'-5'-oligoadenylate synthetase activity(GO:0001730)
0.6	18.5	GO:0097200	cysteine-type endopeptidase activity involved in execution phase of apoptosis(GO:0097200)
0.4	15.0	GO:0003950	NAD+ ADP-ribosyltransferase activity(GO:0003950)
0.1	14.9	GO:0001078	transcriptional repressor activity, RNA polymerase II core promoter proximal region sequence-specific binding(GO:0001078)
0.1	8.2	GO:0043130	ubiquitin binding(GO:0043130)
0.0	7.7	GO:0005525	GTP binding(GO:0005525)
0.5	7.6	GO:0008009	chemokine activity(GO:0008009)
0.2	7.4	GO:0051539	4 iron, 4 sulfur cluster binding(GO:0051539)
0.1	6.1	GO:0005254	chloride channel activity(GO:0005254)
2.0	6.0	GO:0009041	uridylate kinase activity(GO:0009041)
Showing 1 to 10 of 166 entries
Previous
1
2
3
4
5
…
17
Next
Gene overrepresentation in cellular_component category:
Search:
Show 102550100 entries
Log-likelihood per target	Total log-likelihood	Term	Description
0.0	23.7	GO:0005739	mitochondrion(GO:0005739)
0.0	18.7	GO:0048471	perinuclear region of cytoplasm(GO:0048471)
0.6	13.0	GO:0031265	CD95 death-inducing signaling complex(GO:0031265)
0.0	10.0	GO:0005615	extracellular space(GO:0005615)
0.1	8.8	GO:0005811	lipid particle(GO:0005811)
0.0	8.8	GO:0016607	nuclear speck(GO:0016607)
0.4	5.7	GO:0034385	very-low-density lipoprotein particle(GO:0034361) triglyceride-rich lipoprotein particle(GO:0034385)
0.5	5.2	GO:0000813	ESCRT I complex(GO:0000813)
0.0	5.2	GO:0005923	bicellular tight junction(GO:0005923)
0.6	5.1	GO:0030870	Mre11 complex(GO:0030870)
Showing 1 to 10 of 96 entries
Previous
1
2
3
4
5
…
10
Next
Gene overrepresentation in C2:CP category:
Search:
Show 102550100 entries
Log-likelihood per target	Total log-likelihood	Term	Description
0.4	12.3	SA_FAS_SIGNALING	b'The TNF-type receptor Fas induces apoptosis on ligand binding.'
0.1	7.3	PID_IL12_2PATHWAY	b'IL12-mediated signaling events'
0.1	6.5	SIG_PIP3_SIGNALING_IN_B_LYMPHOCYTES	b'Genes related to PIP3 signaling in B lymphocytes'
0.3	6.3	SA_CASPASE_CASCADE	b'Apoptosis is mediated by caspases, cysteine proteases arranged in a proteolytic cascade.'
0.1	5.9	PID_IL4_2PATHWAY	b'IL4-mediated signaling events'
0.3	5.4	SA_MMP_CYTOKINE_CONNECTION	b'Cytokines can induce activation of matrix metalloproteinases, which degrade extracellular matrix.'
0.1	3.7	PID_AJDISS_2PATHWAY	b'Posttranslational regulation of adherens junction stability and dissassembly'
0.1	3.6	PID_NFAT_TFPATHWAY	b'Calcineurin-regulated NFAT-dependent transcription in lymphocytes'
0.1	2.9	PID_TAP63_PATHWAY	b'Validated transcriptional targets of TAp63 isoforms'
0.1	2.8	PID_IFNG_PATHWAY	b'IFN-gamma pathway'
Showing 1 to 10 of 46 entries
Previous
1
2
3
4
5
Next
Gene overrepresentation in C2:CP:REACTOME category:
Search:
Show 102550100 entries
Log-likelihood per target	Total log-likelihood	Term	Description
0.8	52.9	REACTOME_INTERFERON_ALPHA_BETA_SIGNALING	b'Genes involved in Interferon alpha/beta signaling'
0.5	15.4	REACTOME_EXTRINSIC_PATHWAY_FOR_APOPTOSIS	b'Genes involved in Extrinsic Pathway for Apoptosis'
0.3	9.1	REACTOME_INTERFERON_GAMMA_SIGNALING	b'Genes involved in Interferon gamma signaling'
1.0	7.7	REACTOME_ENDOSOMAL_VACUOLAR_PATHWAY	b'Genes involved in Endosomal/Vacuolar pathway'
0.5	7.6	REACTOME_CHEMOKINE_RECEPTORS_BIND_CHEMOKINES	b'Genes involved in Chemokine receptors bind chemokines'
0.0	5.7	REACTOME_ANTIGEN_PROCESSING_UBIQUITINATION_PROTEASOME_DEGRADATION	b'Genes involved in Antigen processing: Ubiquitination & Proteasome degradation'
0.2	5.5	REACTOME_CASPASE_MEDIATED_CLEAVAGE_OF_CYTOSKELETAL_PROTEINS	b'Genes involved in Caspase-mediated cleavage of cytoskeletal proteins'
0.6	5.4	REACTOME_NFKB_ACTIVATION_THROUGH_FADD_RIP1_PATHWAY_MEDIATED_BY_CASPASE_8_AND10	b'Genes involved in NF-kB activation through FADD/RIP-1 pathway mediated by caspase-8 and -10'
0.2	4.3	REACTOME_REGULATION_OF_INSULIN_LIKE_GROWTH_FACTOR_IGF_ACTIVITY_BY_INSULIN_LIKE_GROWTH_FACTOR_BINDING_PROTEINS_IGFBPS	b'Genes involved in Regulation of Insulin-like Growth Factor (IGF) Activity by Insulin-like Growth Factor Binding Proteins (IGFBPs)'
0.3	3.8	REACTOME_PD1_SIGNALING	b'Genes involved in PD-1 signaling'
Showing 1 to 10 of 55 entries
Previous
1
2
3
4
5
6
Next
