# Supplementary material for: Transcriptome profiling of hiPSC-derived LSECs with nanoCAGE
Source: Royal Society of Chemistry journal article supplement (doi:10.1039/c9mo00135b), 2020-01-10
Supplement: c9mo00135b6.xlsx [file c9mo00135b6.xlsx]

## Sheet: E2F5
Top targets:
Search:
Show 102550100 entries
Promoter	Score	Transcript	Gene	Gene Info
chr2_-_136633940	1.96	ENST00000264156.2	MCM6	minichromosome maintenance complex component 6
chr7_+_99699179	1.74	ENST00000438383.1	AP4M1	adaptor-related protein complex 4, mu 1 subunit
		ENST00000429084.1
		ENST00000359593.4
		ENST00000439416.1
chr10_+_62538089	1.63	ENST00000519078.2	CDK1	cyclin-dependent kinase 1
		ENST00000395284.3
		ENST00000316629.4
chr11_+_62623512	1.47	ENST00000377892.1	SLC3A2	solute carrier family 3 (amino acid transporter heavy chain), member 2
chr1_+_145209092	1.42	ENST00000362074.6	NOTCH2NL	notch 2 N-terminal like
		ENST00000344859.3
chr20_+_25388293	1.40	ENST00000262460.4	GINS1	GINS complex subunit 1 (Psf1 homolog)
		ENST00000429262.2
chr1_+_13910194	1.19	ENST00000376057.4	PDPN	podoplanin
		ENST00000510906.1
chr11_+_62623544	1.17	ENST00000377890.2	SLC3A2	solute carrier family 3 (amino acid transporter heavy chain), member 2
		ENST00000377891.2
		ENST00000377889.2
chr1_-_120612240	1.10	ENST00000256646.2	NOTCH2	notch 2
chr6_-_27782548	1.05	ENST00000333151.3	HIST1H2AJ	histone cluster 1, H2aj
Showing 1 to 10 of 200 entries
Previous
1
2
3
4
5
…
20
Next
Gene Ontology Analysis
Gene overrepresentation in molecular_function category:
Search:
Show 102550100 entries
Log-likelihood per target	Total log-likelihood	Term	Description
0.1	3.5	GO:0004003	ATP-dependent DNA helicase activity(GO:0004003)
0.3	2.9	GO:0005432	calcium:sodium antiporter activity(GO:0005432)
0.0	2.8	GO:0004386	helicase activity(GO:0004386)
0.2	2.1	GO:0001135	transcription factor activity, RNA polymerase II transcription factor recruiting(GO:0001135)
0.1	2.1	GO:0008353	RNA polymerase II carboxy-terminal domain kinase activity(GO:0008353)
0.0	2.1	GO:0003725	double-stranded RNA binding(GO:0003725)
0.1	1.8	GO:0003688	DNA replication origin binding(GO:0003688)
0.1	1.7	GO:0043138	3'-5' DNA helicase activity(GO:0043138)
0.0	1.6	GO:0003684	damaged DNA binding(GO:0003684)
0.2	1.3	GO:0016725	ribonucleoside-diphosphate reductase activity, thioredoxin disulfide as acceptor(GO:0004748) oxidoreductase activity, acting on CH or CH2 groups(GO:0016725) oxidoreductase activity, acting on CH or CH2 groups, disulfide as acceptor(GO:0016728) ribonucleoside-diphosphate reductase activity(GO:0061731)
Showing 1 to 10 of 51 entries
Previous
1
2
3
4
5
6
Next
Gene overrepresentation in C2:CP:REACTOME category:
Search:
Show 102550100 entries
Log-likelihood per target	Total log-likelihood	Term	Description
0.4	7.9	REACTOME_UNWINDING_OF_DNA	b'Genes involved in Unwinding of DNA'
0.2	5.1	REACTOME_G1_S_SPECIFIC_TRANSCRIPTION	b'Genes involved in G1/S-Specific Transcription'
0.1	2.9	REACTOME_BASIGIN_INTERACTIONS	b'Genes involved in Basigin interactions'
0.0	2.2	REACTOME_MEIOTIC_RECOMBINATION	b'Genes involved in Meiotic Recombination'
0.0	2.0	REACTOME_G1_PHASE	b'Genes involved in G1 Phase'
0.1	1.6	REACTOME_ACTIVATION_OF_THE_PRE_REPLICATIVE_COMPLEX	b'Genes involved in Activation of the pre-replicative complex'
0.1	1.3	REACTOME_HOMOLOGOUS_RECOMBINATION_REPAIR_OF_REPLICATION_INDEPENDENT_DOUBLE_STRAND_BREAKS	b'Genes involved in Homologous recombination repair of replication-independent double-strand breaks'
0.1	1.0	REACTOME_ASSOCIATION_OF_LICENSING_FACTORS_WITH_THE_PRE_REPLICATIVE_COMPLEX	b'Genes involved in Association of licensing factors with the pre-replicative complex'
0.0	1.0	REACTOME_VIRAL_MESSENGER_RNA_SYNTHESIS	b'Genes involved in Viral Messenger RNA Synthesis'
0.0	1.0	REACTOME_REGULATION_OF_GLUCOKINASE_BY_GLUCOKINASE_REGULATORY_PROTEIN	b'Genes involved in Regulation of Glucokinase by Glucokinase Regulatory Protein'
Showing 1 to 10 of 23 entries
Previous
1
2
3
Next
Gene overrepresentation in cellular_component category:
Search:
Show 102550100 entries
Log-likelihood per target	Total log-likelihood	Term	Description
0.3	6.2	GO:0042555	MCM complex(GO:0042555)
0.0	2.9	GO:0048770	melanosome(GO:0042470) pigment granule(GO:0048770)
0.1	2.5	GO:0005721	pericentric heterochromatin(GO:0005721)
0.4	2.1	GO:0097125	cyclin B1-CDK1 complex(GO:0097125)
0.0	1.8	GO:0019005	SCF ubiquitin ligase complex(GO:0019005)
0.4	1.7	GO:0000811	GINS complex(GO:0000811)
0.2	1.7	GO:0000138	Golgi trans cisterna(GO:0000138)
0.0	1.4	GO:0044815	DNA packaging complex(GO:0044815)
0.2	1.3	GO:0005971	ribonucleoside-diphosphate reductase complex(GO:0005971)
0.1	1.2	GO:0097197	tetraspanin-enriched microdomain(GO:0097197)
Showing 1 to 10 of 58 entries
Previous
1
2
3
4
5
6
Next
Gene overrepresentation in C2:CP category:
Search:
Show 102550100 entries
Log-likelihood per target	Total log-likelihood	Term	Description
0.0	3.3	PID_E2F_PATHWAY	b'E2F transcription factor network'
0.3	3.2	SA_G2_AND_M_PHASES	b'Cdc25 activates the cdc2/cyclin B complex to induce the G2/M transition.'
0.0	3.0	PID_NFAT_TFPATHWAY	b'Calcineurin-regulated NFAT-dependent transcription in lymphocytes'
0.0	3.0	PID_ATR_PATHWAY	b'ATR signaling pathway'
0.1	2.4	PID_FOXM1_PATHWAY	b'FOXM1 transcription factor network'
0.1	2.1	PID_FRA_PATHWAY	b'Validated transcriptional targets of AP1 family members Fra1 and Fra2'
0.0	1.8	PID_FANCONI_PATHWAY	b'Fanconi anemia pathway'
0.0	1.1	PID_DELTA_NP63_PATHWAY	b'Validated transcriptional targets of deltaNp63 isoforms'
0.0	1.0	PID_RB_1PATHWAY	b'Regulation of retinoblastoma protein'
0.0	0.8	PID_P38_GAMMA_DELTA_PATHWAY	b'Signaling mediated by p38-gamma and p38-delta'
Showing 1 to 10 of 18 entries
Previous
1
2
Next
Gene overrepresentation in biological_process category:
Search:
Show 102550100 entries
Log-likelihood per target	Total log-likelihood	Term	Description
0.4	4.7	GO:0006268	DNA unwinding involved in DNA replication(GO:0006268)
0.1	3.5	GO:0006270	DNA replication initiation(GO:0006270)
0.6	2.9	GO:0060356	leucine import(GO:0060356)
0.0	2.2	GO:0006342	chromatin silencing(GO:0006342)
0.4	2.1	GO:0014038	regulation of Schwann cell differentiation(GO:0014038)
0.2	2.0	GO:1902969	mitotic DNA replication(GO:1902969)
0.4	1.8	GO:0071460	cellular response to cell-matrix adhesion(GO:0071460)
0.0	1.8	GO:0045071	negative regulation of viral genome replication(GO:0045071)
0.1	1.7	GO:0006895	Golgi to endosome transport(GO:0006895)
0.0	1.4	GO:0000083	regulation of transcription involved in G1/S transition of mitotic cell cycle(GO:0000083)
Showing 1 to 10 of 98 entries
Previous
1
2
3
4
5
…
10
Next

## Sheet: PBX3
Top targets:
Search:
Show 102550100 entries
Promoter	Score	Transcript	Gene	Gene Info
chr1_-_247171347	1.45	ENST00000339986.7	ZNF695	zinc finger protein 695
		ENST00000487338.2
chr19_+_19976714	1.45	ENST00000589717.1	ZNF253	zinc finger protein 253
		ENST00000355650.4
chr19_-_22193731	1.43	ENST00000601773.1	ZNF208	zinc finger protein 208
		ENST00000397126.4
		ENST00000601993.1
		ENST00000599916.1
chr2_-_179672142	1.43	ENST00000342992.6	TTN	titin
		ENST00000360870.5
		ENST00000460472.2
		ENST00000589042.1
		ENST00000591111.1
		ENST00000342175.6
		ENST00000359218.5
chr19_+_21324827	1.28	ENST00000600692.1	ZNF431	zinc finger protein 431
		ENST00000599296.1
		ENST00000594425.1
		ENST00000311048.7
chr7_+_64838712	1.19	ENST00000328747.7	ZNF92	zinc finger protein 92
		ENST00000431504.1
		ENST00000357512.2
chr19_+_20011731	1.15	ENST00000591366.1	ZNF93	zinc finger protein 93
chr19_+_19976683	1.15	ENST00000592725.1	ZNF253	zinc finger protein 253
chr11_-_3400442	1.13	ENST00000429541.2	ZNF195	zinc finger protein 195
		ENST00000532539.1
chr19_+_20188830	1.12	ENST00000418063.2	ZNF90	zinc finger protein 90
Showing 1 to 10 of 200 entries
Previous
1
2
3
4
5
…
20
Next
Gene Ontology Analysis
Gene overrepresentation in biological_process category:
Search:
Show 102550100 entries
Log-likelihood per target	Total log-likelihood	Term	Description
0.8	3.1	GO:0070894	transposon integration(GO:0070893) regulation of transposon integration(GO:0070894) negative regulation of transposon integration(GO:0070895)
0.0	1.6	GO:0043433	negative regulation of sequence-specific DNA binding transcription factor activity(GO:0043433)
0.4	1.5	GO:0035469	determination of pancreatic left/right asymmetry(GO:0035469)
0.5	1.4	GO:0048769	detection of muscle stretch(GO:0035995) sarcomerogenesis(GO:0048769)
0.3	1.4	GO:0071688	striated muscle myosin thick filament assembly(GO:0071688)
0.0	1.3	GO:0035335	peptidyl-tyrosine dephosphorylation(GO:0035335)
0.1	1.2	GO:0009954	proximal/distal pattern formation(GO:0009954)
0.1	1.1	GO:0003402	planar cell polarity pathway involved in axis elongation(GO:0003402) positive regulation of synaptic vesicle clustering(GO:2000809)
0.3	1.0	GO:2000543	positive regulation of gastrulation(GO:2000543)
0.2	1.0	GO:0033490	cholesterol biosynthetic process via desmosterol(GO:0033489) cholesterol biosynthetic process via lathosterol(GO:0033490)
Showing 1 to 10 of 125 entries
Previous
1
2
3
4
5
…
13
Next
Gene overrepresentation in cellular_component category:
Search:
Show 102550100 entries
Log-likelihood per target	Total log-likelihood	Term	Description
0.0	4.0	GO:0090575	RNA polymerase II transcription factor complex(GO:0090575)
0.3	2.0	GO:1990393	3M complex(GO:1990393)
0.1	1.4	GO:0005859	muscle myosin complex(GO:0005859)
0.0	1.4	GO:0016605	PML body(GO:0016605)
0.1	1.0	GO:0042382	paraspeckles(GO:0042382)
0.0	1.0	GO:0005640	nuclear outer membrane(GO:0005640)
0.0	1.0	GO:0031201	SNARE complex(GO:0031201)
0.1	0.9	GO:0005642	annulate lamellae(GO:0005642)
0.1	0.8	GO:0036056	filtration diaphragm(GO:0036056) slit diaphragm(GO:0036057)
0.1	0.8	GO:0000940	condensed chromosome outer kinetochore(GO:0000940)
Showing 1 to 10 of 42 entries
Previous
1
2
3
4
5
Next
Gene overrepresentation in molecular_function category:
Search:
Show 102550100 entries
Log-likelihood per target	Total log-likelihood	Term	Description
0.0	13.3	GO:0008270	zinc ion binding(GO:0008270)
0.0	3.3	GO:0001047	core promoter binding(GO:0001047)
0.0	1.5	GO:0031624	ubiquitin conjugating enzyme binding(GO:0031624)
0.4	1.4	GO:0031433	telethonin binding(GO:0031433)
0.2	1.4	GO:0051371	muscle alpha-actinin binding(GO:0051371)
0.0	1.3	GO:0004003	ATP-dependent DNA helicase activity(GO:0004003)
0.0	1.2	GO:0030145	manganese ion binding(GO:0030145)
0.2	1.1	GO:0070699	type II activin receptor binding(GO:0070699)
0.1	1.1	GO:0036312	phosphatidylinositol 3-kinase regulatory subunit binding(GO:0036312)
0.0	1.1	GO:0008190	eukaryotic initiation factor 4E binding(GO:0008190)
Showing 1 to 10 of 91 entries
Previous
1
2
3
4
5
…
10
Next
Gene overrepresentation in C2:CP:REACTOME category:
Search:
Show 102550100 entries
Log-likelihood per target	Total log-likelihood	Term	Description
0.0	13.9	REACTOME_GENERIC_TRANSCRIPTION_PATHWAY	b'Genes involved in Generic Transcription Pathway'
0.0	1.4	REACTOME_SIGNALING_BY_FGFR1_FUSION_MUTANTS	b'Genes involved in Signaling by FGFR1 fusion mutants'
0.0	1.4	REACTOME_ANTIVIRAL_MECHANISM_BY_IFN_STIMULATED_GENES	b'Genes involved in Antiviral mechanism by IFN-stimulated genes'
0.1	1.0	REACTOME_SYNTHESIS_OF_SUBSTRATES_IN_N_GLYCAN_BIOSYTHESIS	b'Genes involved in Synthesis of substrates in N-glycan biosythesis'
0.0	1.0	REACTOME_CHOLESTEROL_BIOSYNTHESIS	b'Genes involved in Cholesterol biosynthesis'
0.0	0.9	REACTOME_CYCLIN_A_B1_ASSOCIATED_EVENTS_DURING_G2_M_TRANSITION	b'Genes involved in Cyclin A/B1 associated events during G2/M transition'
0.0	0.9	REACTOME_RNA_POL_III_TRANSCRIPTION_INITIATION_FROM_TYPE_3_PROMOTER	b'Genes involved in RNA Polymerase III Transcription Initiation From Type 3 Promoter'
0.1	0.8	REACTOME_ACYL_CHAIN_REMODELLING_OF_PS	b'Genes involved in Acyl chain remodelling of PS'
0.0	0.6	REACTOME_PD1_SIGNALING	b'Genes involved in PD-1 signaling'
0.0	0.6	REACTOME_ZINC_TRANSPORTERS	b'Genes involved in Zinc transporters'
Showing 1 to 10 of 31 entries
Previous
1
2
3
4
Next
Gene overrepresentation in C2:CP category:
Search:
Show 102550100 entries
Log-likelihood per target	Total log-likelihood	Term	Description
0.0	1.7	PID_REG_GR_PATHWAY	b'Glucocorticoid receptor regulatory network'
0.0	1.4	PID_PLK1_PATHWAY	b'PLK1 signaling events'
0.0	1.0	PID_CIRCADIAN_PATHWAY	b'Circadian rhythm pathway'
0.0	1.0	PID_P38_MK2_PATHWAY	b'p38 signaling mediated by MAPKAP kinases'
0.0	0.8	PID_ARF6_DOWNSTREAM_PATHWAY	b'Arf6 downstream pathway'
0.0	0.8	ST_WNT_BETA_CATENIN_PATHWAY	b'Wnt/beta-catenin Pathway'
0.0	0.6	PID_EPHRINB_REV_PATHWAY	b'Ephrin B reverse signaling'
0.0	0.5	PID_TCR_JNK_PATHWAY	b'JNK signaling in the CD4+ TCR pathway'
0.0	0.4	PID_RANBP2_PATHWAY	b'Sumoylation by RanBP2 regulates transcriptional repression'
0.0	0.4	PID_PRL_SIGNALING_EVENTS_PATHWAY	b'Signaling events mediated by PRL'
Showing 1 to 10 of 11 entries
Previous
1
2
Next

## Sheet: KLF16
Top targets:
Search:
Show 102550100 entries
Promoter	Score	Transcript	Gene	Gene Info
chr21_+_35445811	3.25	ENST00000399312.2	MRPS6	mitochondrial ribosomal protein S6
chr13_-_114018400	3.07	ENST00000375430.4	GRTP1	growth hormone regulated TBC protein 1
		ENST00000375431.4
chr6_+_3000057	2.61	ENST00000397717.2	NQO2	NAD(P)H dehydrogenase, quinone 2
chr18_+_11981427	2.57	ENST00000269159.3	IMPA2	inositol(myo)-1(or 4)-monophosphatase 2
chr17_+_79008940	2.57	ENST00000392411.3	BAIAP2	BAI1-associated protein 2
		ENST00000575989.1
		ENST00000321280.7
		ENST00000428708.2
		ENST00000575712.1
		ENST00000575245.1
		ENST00000435091.3
		ENST00000321300.6
chr19_+_30302805	2.53	ENST00000262643.3	CCNE1	cyclin E1
		ENST00000575243.1
		ENST00000357943.5
chr19_-_55658281	2.31	ENST00000585321.2	TNNT1	troponin T type 1 (skeletal, slow)
		ENST00000587465.2
chr19_+_59055814	2.19	ENST00000594806.1	TRIM28	tripartite motif containing 28
		ENST00000253024.5
		ENST00000341753.6
chr20_+_31350184	2.15	ENST00000328111.2	DNMT3B	DNA (cytosine-5-)-methyltransferase 3 beta
		ENST00000353855.2
		ENST00000348286.2
chr8_-_494824	2.13	ENST00000427263.2	TDRP	testis development related protein
		ENST00000324079.6
Showing 1 to 10 of 200 entries
Previous
1
2
3
4
5
…
20
Next
Gene Ontology Analysis
Gene overrepresentation in C2:CP category:
Search:
Show 102550100 entries
Log-likelihood per target	Total log-likelihood	Term	Description
0.1	7.8	PID_MYC_ACTIV_PATHWAY	b'Validated targets of C-MYC transcriptional activation'
0.1	7.4	SIG_REGULATION_OF_THE_ACTIN_CYTOSKELETON_BY_RHO_GTPASES	b'Genes related to regulation of the actin cytoskeleton'
0.1	7.4	PID_SMAD2_3NUCLEAR_PATHWAY	b'Regulation of nuclear SMAD2/3 signaling'
0.1	6.3	PID_ATM_PATHWAY	b'ATM pathway'
0.2	5.9	PID_BARD1_PATHWAY	b'BARD1 signaling events'
0.1	5.3	PID_FOXM1_PATHWAY	b'FOXM1 transcription factor network'
0.2	4.9	PID_TOLL_ENDOGENOUS_PATHWAY	b'Endogenous TLR signaling'
0.1	4.2	PID_GLYPICAN_1PATHWAY	b'Glypican 1 network'
0.2	4.1	PID_ERBB_NETWORK_PATHWAY	b'ErbB receptor signaling network'
0.1	4.1	PID_P38_MK2_PATHWAY	b'p38 signaling mediated by MAPKAP kinases'
Showing 1 to 10 of 72 entries
Previous
1
2
3
4
5
…
8
Next
Gene overrepresentation in C2:CP:REACTOME category:
Search:
Show 102550100 entries
Log-likelihood per target	Total log-likelihood	Term	Description
0.0	10.8	REACTOME_GENERIC_TRANSCRIPTION_PATHWAY	b'Genes involved in Generic Transcription Pathway'
0.2	8.5	REACTOME_DEADENYLATION_OF_MRNA	b'Genes involved in Deadenylation of mRNA'
0.2	8.3	REACTOME_DOWNREGULATION_OF_SMAD2_3_SMAD4_TRANSCRIPTIONAL_ACTIVITY	b'Genes involved in Downregulation of SMAD2/3:SMAD4 transcriptional activity'
0.0	8.2	REACTOME_METABOLISM_OF_AMINO_ACIDS_AND_DERIVATIVES	b'Genes involved in Metabolism of amino acids and derivatives'
0.2	6.6	REACTOME_SULFUR_AMINO_ACID_METABOLISM	b'Genes involved in Sulfur amino acid metabolism'
0.1	6.0	REACTOME_KINESINS	b'Genes involved in Kinesins'
0.1	5.9	REACTOME_GLUCOSE_TRANSPORT	b'Genes involved in Glucose transport'
0.1	5.5	REACTOME_DEPOSITION_OF_NEW_CENPA_CONTAINING_NUCLEOSOMES_AT_THE_CENTROMERE	b'Genes involved in Deposition of New CENPA-containing Nucleosomes at the Centromere'
0.1	5.2	REACTOME_INFLUENZA_VIRAL_RNA_TRANSCRIPTION_AND_REPLICATION	b'Genes involved in Influenza Viral RNA Transcription and Replication'
0.2	5.0	REACTOME_G1_S_SPECIFIC_TRANSCRIPTION	b'Genes involved in G1/S-Specific Transcription'
Showing 1 to 10 of 172 entries
Previous
1
2
3
4
5
…
18
Next
Gene overrepresentation in cellular_component category:
Search:
Show 102550100 entries
Log-likelihood per target	Total log-likelihood	Term	Description
0.1	7.3	GO:0016328	lateral plasma membrane(GO:0016328)
0.2	7.2	GO:0000791	euchromatin(GO:0000791)
0.1	5.8	GO:0010494	cytoplasmic stress granule(GO:0010494)
0.1	5.1	GO:0005876	spindle microtubule(GO:0005876)
0.1	5.0	GO:0031941	filamentous actin(GO:0031941)
0.1	5.0	GO:0022626	cytosolic ribosome(GO:0022626)
0.1	4.8	GO:0043198	dendritic shaft(GO:0043198)
0.1	4.6	GO:0005782	peroxisomal matrix(GO:0005782) microbody lumen(GO:0031907)
0.2	4.4	GO:0005666	DNA-directed RNA polymerase III complex(GO:0005666)
0.3	4.2	GO:0031209	SCAR complex(GO:0031209)
Showing 1 to 10 of 392 entries
Previous
1
2
3
4
5
…
40
Next
Gene overrepresentation in biological_process category:
Search:
Show 102550100 entries
Log-likelihood per target	Total log-likelihood	Term	Description
0.2	8.8	GO:0006270	DNA replication initiation(GO:0006270)
0.1	5.3	GO:0070125	mitochondrial translational elongation(GO:0070125)
0.2	5.2	GO:0006359	regulation of transcription from RNA polymerase III promoter(GO:0006359)
0.4	5.0	GO:0030208	dermatan sulfate biosynthetic process(GO:0030208)
0.8	4.9	GO:0060671	epithelial cell differentiation involved in embryonic placenta development(GO:0060671) epithelial cell morphogenesis involved in placental branching(GO:0060672)
0.4	4.6	GO:1990416	cellular response to brain-derived neurotrophic factor stimulus(GO:1990416)
0.2	4.4	GO:0051382	kinetochore assembly(GO:0051382)
0.6	4.3	GO:0010587	miRNA catabolic process(GO:0010587)
0.3	4.3	GO:0060670	branching involved in labyrinthine layer morphogenesis(GO:0060670)
0.4	4.2	GO:0006065	UDP-glucuronate biosynthetic process(GO:0006065)
Showing 1 to 10 of 1,119 entries
Previous
1
2
3
4
5
…
112
Next
Gene overrepresentation in molecular_function category:
Search:
Show 102550100 entries
Log-likelihood per target	Total log-likelihood	Term	Description
0.1	8.5	GO:0048365	Rac GTPase binding(GO:0048365)
0.1	7.9	GO:0003899	DNA-directed RNA polymerase activity(GO:0003899)
0.0	6.4	GO:0003735	structural constituent of ribosome(GO:0003735)
0.2	5.8	GO:0098641	cadherin binding involved in cell-cell adhesion(GO:0098641)
0.3	5.6	GO:0043395	heparan sulfate proteoglycan binding(GO:0043395)
0.1	5.5	GO:0050699	WW domain binding(GO:0050699)
0.2	5.0	GO:0005385	zinc ion transmembrane transporter activity(GO:0005385)
0.1	4.7	GO:0004867	serine-type endopeptidase inhibitor activity(GO:0004867)
0.2	4.6	GO:0031005	filamin binding(GO:0031005)
0.3	4.5	GO:1990825	sequence-specific mRNA binding(GO:1990825)
Showing 1 to 10 of 631 entries
Previous
1
2
3
4
5
…
64
Next

## Sheet: TAF1
Top targets:
Search:
Show 102550100 entries
Promoter	Score	Transcript	Gene	Gene Info
chr19_+_797392	2.23	ENST00000350092.4	PTBP1	polypyrimidine tract binding protein 1
		ENST00000349038.4
		ENST00000586481.1
		ENST00000585535.1
chr20_+_61569463	2.00	ENST00000266069.3	GID8	GID complex subunit 8
chr12_-_57119300	1.68	ENST00000546917.1	NACA	nascent polypeptide-associated complex alpha subunit
		ENST00000454682.1
chr18_-_47814032	1.67	ENST00000589548.1	CXXC1	CXXC finger protein 1
		ENST00000591474.1
chr1_-_161015752	1.66	ENST00000435396.1	USF1	upstream transcription factor 1
		ENST00000368021.3
chr12_-_95942563	1.39	ENST00000549639.1	USP44	ubiquitin specific peptidase 44
		ENST00000551837.1
chr8_-_117886563	1.39	ENST00000519837.1	RAD21	RAD21 homolog (S. pombe)
		ENST00000522699.1
chr16_-_2827128	1.38	ENST00000494946.2	TCEB2	transcription elongation factor B (SIII), polypeptide 2 (18kDa, elongin B)
		ENST00000409477.1
		ENST00000572954.1
		ENST00000262306.7
		ENST00000409906.4
chr14_-_23504337	1.33	ENST00000361611.6	PSMB5	proteasome (prosome, macropain) subunit, beta type, 5
chr20_-_54967187	1.31	ENST00000422322.1	AURKA	aurora kinase A
		ENST00000371356.2
		ENST00000451915.1
		ENST00000347343.2
		ENST00000395911.1
		ENST00000395907.1
		ENST00000441357.1
		ENST00000456249.1
		ENST00000420474.1
		ENST00000395909.4
		ENST00000395914.1
		ENST00000312783.6
		ENST00000395915.3
		ENST00000395913.3
Showing 1 to 10 of 200 entries
Previous
1
2
3
4
5
…
20
Next
Gene Ontology Analysis
Gene overrepresentation in C2:CP category:
Search:
Show 102550100 entries
Log-likelihood per target	Total log-likelihood	Term	Description
0.0	5.5	PID_P73PATHWAY	b'p73 transcription factor network'
0.1	3.2	PID_FRA_PATHWAY	b'Validated transcriptional targets of AP1 family members Fra1 and Fra2'
0.0	2.7	PID_P38_ALPHA_BETA_DOWNSTREAM_PATHWAY	b'Signaling mediated by p38-alpha and p38-beta'
0.0	2.5	PID_E2F_PATHWAY	b'E2F transcription factor network'
0.0	2.4	PID_AURORA_B_PATHWAY	b'Aurora B signaling'
0.0	2.2	PID_NFAT_TFPATHWAY	b'Calcineurin-regulated NFAT-dependent transcription in lymphocytes'
0.0	1.9	PID_NOTCH_PATHWAY	b'Notch signaling pathway'
0.0	1.8	PID_MYC_ACTIV_PATHWAY	b'Validated targets of C-MYC transcriptional activation'
0.0	1.7	PID_SMAD2_3NUCLEAR_PATHWAY	b'Regulation of nuclear SMAD2/3 signaling'
0.0	1.5	PID_MYC_REPRESS_PATHWAY	b'Validated targets of C-MYC transcriptional repression'
Showing 1 to 10 of 35 entries
Previous
1
2
3
4
Next
Gene overrepresentation in cellular_component category:
Search:
Show 102550100 entries
Log-likelihood per target	Total log-likelihood	Term	Description
0.1	6.5	GO:0005762	organellar large ribosomal subunit(GO:0000315) mitochondrial large ribosomal subunit(GO:0005762)
0.0	5.5	GO:0071013	catalytic step 2 spliceosome(GO:0071013)
0.7	4.9	GO:0005854	nascent polypeptide-associated complex(GO:0005854)
0.7	4.0	GO:0000798	nuclear cohesin complex(GO:0000798)
0.3	3.7	GO:0019774	proteasome core complex, beta-subunit complex(GO:0019774)
0.1	3.7	GO:0031519	PcG protein complex(GO:0031519)
0.2	3.1	GO:0048188	Set1C/COMPASS complex(GO:0048188)
0.1	3.0	GO:0016281	eukaryotic translation initiation factor 4F complex(GO:0016281)
0.1	2.9	GO:0005852	eukaryotic translation initiation factor 3 complex(GO:0005852)
0.3	2.6	GO:0016589	NURF complex(GO:0016589)
Showing 1 to 10 of 179 entries
Previous
1
2
3
4
5
…
18
Next
Gene overrepresentation in molecular_function category:
Search:
Show 102550100 entries
Log-likelihood per target	Total log-likelihood	Term	Description
0.0	8.9	GO:0003735	structural constituent of ribosome(GO:0003735)
0.1	5.6	GO:0003743	translation initiation factor activity(GO:0003743)
0.1	4.3	GO:0008187	poly-pyrimidine tract binding(GO:0008187)
0.2	4.0	GO:0004298	threonine-type endopeptidase activity(GO:0004298) threonine-type peptidase activity(GO:0070003)
0.2	3.0	GO:0043522	leucine zipper domain binding(GO:0043522)
0.0	2.6	GO:0003725	double-stranded RNA binding(GO:0003725)
0.5	2.5	GO:0001228	transcriptional activator activity, RNA polymerase II transcription regulatory region sequence-specific binding(GO:0001228)
0.2	2.5	GO:0036402	proteasome-activating ATPase activity(GO:0036402)
0.2	2.5	GO:0051864	histone demethylase activity (H3-K36 specific)(GO:0051864)
0.1	2.4	GO:0016274	arginine N-methyltransferase activity(GO:0016273) protein-arginine N-methyltransferase activity(GO:0016274)
Showing 1 to 10 of 248 entries
Previous
1
2
3
4
5
…
25
Next
Gene overrepresentation in C2:CP:REACTOME category:
Search:
Show 102550100 entries
Log-likelihood per target	Total log-likelihood	Term	Description
0.1	8.8	REACTOME_VIF_MEDIATED_DEGRADATION_OF_APOBEC3G	b'Genes involved in Vif-mediated degradation of APOBEC3G'
0.1	6.5	REACTOME_MRNA_SPLICING	b'Genes involved in mRNA Splicing'
0.0	5.6	REACTOME_CHROMOSOME_MAINTENANCE	b'Genes involved in Chromosome Maintenance'
0.1	4.8	REACTOME_FORMATION_OF_THE_TERNARY_COMPLEX_AND_SUBSEQUENTLY_THE_43S_COMPLEX	b'Genes involved in Formation of the ternary complex, and subsequently, the 43S complex'
0.1	4.4	REACTOME_DEADENYLATION_OF_MRNA	b'Genes involved in Deadenylation of mRNA'
0.1	4.4	REACTOME_MRNA_3_END_PROCESSING	b"Genes involved in mRNA 3'-end processing"
0.0	2.6	REACTOME_NONSENSE_MEDIATED_DECAY_ENHANCED_BY_THE_EXON_JUNCTION_COMPLEX	b'Genes involved in Nonsense Mediated Decay Enhanced by the Exon Junction Complex'
0.0	2.5	REACTOME_METABOLISM_OF_NON_CODING_RNA	b'Genes involved in Metabolism of non-coding RNA'
0.0	2.5	REACTOME_SIGNALING_BY_RHO_GTPASES	b'Genes involved in Signaling by Rho GTPases'
0.1	2.2	REACTOME_CYTOCHROME_P450_ARRANGED_BY_SUBSTRATE_TYPE	b'Genes involved in Cytochrome P450 - arranged by substrate type'
Showing 1 to 10 of 76 entries
Previous
1
2
3
4
5
…
8
Next
Gene overrepresentation in biological_process category:
Search:
Show 102550100 entries
Log-likelihood per target	Total log-likelihood	Term	Description
0.1	7.1	GO:0070125	mitochondrial translational elongation(GO:0070125)
0.3	3.6	GO:0045876	positive regulation of sister chromatid cohesion(GO:0045876)
0.1	3.6	GO:0006521	regulation of cellular amino acid metabolic process(GO:0006521)
0.2	3.5	GO:0075522	IRES-dependent viral translational initiation(GO:0075522)
0.1	2.9	GO:0006409	tRNA export from nucleus(GO:0006409) tRNA-containing ribonucleoprotein complex export from nucleus(GO:0071431)
0.1	2.8	GO:0000083	regulation of transcription involved in G1/S transition of mitotic cell cycle(GO:0000083)
0.0	2.8	GO:0036498	IRE1-mediated unfolded protein response(GO:0036498)
0.2	2.7	GO:0045899	positive regulation of RNA polymerase II transcriptional preinitiation complex assembly(GO:0045899)
0.0	2.7	GO:0045071	negative regulation of viral genome replication(GO:0045071)
0.0	2.4	GO:0000380	alternative mRNA splicing, via spliceosome(GO:0000380)
Showing 1 to 10 of 394 entries
Previous
1
2
3
4
5
…
40
Next

## Sheet: MTA3
Top targets:
Search:
Show 102550100 entries
Promoter	Score	Transcript	Gene	Gene Info
chr6_-_125623046	6.45	ENST00000608295.1	HDDC2	HD domain containing 2
		ENST00000398153.2
		ENST00000608284.1
		ENST00000368377.4
chr19_-_55658281	5.92	ENST00000585321.2	TNNT1	troponin T type 1 (skeletal, slow)
		ENST00000587465.2
chr20_+_31350184	5.16	ENST00000328111.2	DNMT3B	DNA (cytosine-5-)-methyltransferase 3 beta
		ENST00000353855.2
		ENST00000348286.2
chr7_+_128431444	4.11	ENST00000459946.1	CCDC136	coiled-coil domain containing 136
		ENST00000378685.4
		ENST00000464832.1
		ENST00000472049.1
		ENST00000488925.1
chr3_+_173115520	4.07	ENST00000413821.1	NLGN1	neuroligin 1
chrX_-_102319092	4.03	ENST00000372728.3	BEX1	brain expressed, X-linked 1
chr19_+_35645618	3.88	ENST00000392218.2	FXYD5	FXYD domain containing ion transport regulator 5
		ENST00000543307.1
		ENST00000392219.2
		ENST00000541435.2
		ENST00000590686.1
		ENST00000342879.3
		ENST00000588699.1
chr4_-_185570590	3.87	ENST00000517513.1	CASP3	caspase 3, apoptosis-related cysteine peptidase
		ENST00000447121.2
		ENST00000393588.4
		ENST00000308394.4
		ENST00000523916.1
chr15_+_80351977	3.82	ENST00000559157.1	ZFAND6	zinc finger, AN1-type domain 6
		ENST00000561012.1
		ENST00000564367.1
		ENST00000558494.1
chr12_-_77272765	3.68	ENST00000547435.1	CSRP2	cysteine and glycine-rich protein 2
		ENST00000552330.1
		ENST00000546966.1
		ENST00000311083.5
Showing 1 to 10 of 200 entries
Previous
1
2
3
4
5
…
20
Next
Gene Ontology Analysis
Gene overrepresentation in C2:CP category:
Search:
Show 102550100 entries
Log-likelihood per target	Total log-likelihood	Term	Description
0.2	30.6	PID_MYC_ACTIV_PATHWAY	b'Validated targets of C-MYC transcriptional activation'
0.3	26.9	PID_PLK1_PATHWAY	b'PLK1 signaling events'
0.5	26.7	PID_BARD1_PATHWAY	b'BARD1 signaling events'
0.4	19.3	PID_FANCONI_PATHWAY	b'Fanconi anemia pathway'
0.4	15.2	PID_ATM_PATHWAY	b'ATM pathway'
0.3	12.5	PID_FOXM1_PATHWAY	b'FOXM1 transcription factor network'
0.2	10.7	PID_SYNDECAN_4_PATHWAY	b'Syndecan-4-mediated signaling events'
0.1	9.9	PID_P73PATHWAY	b'p73 transcription factor network'
0.2	9.2	PID_P38_MK2_PATHWAY	b'p38 signaling mediated by MAPKAP kinases'
0.4	8.8	PID_ERBB_NETWORK_PATHWAY	b'ErbB receptor signaling network'
Showing 1 to 10 of 87 entries
Previous
1
2
3
4
5
…
9
Next
Gene overrepresentation in molecular_function category:
Search:
Show 102550100 entries
Log-likelihood per target	Total log-likelihood	Term	Description
0.1	141.2	GO:0003677	DNA binding(GO:0003677)
0.3	64.2	GO:0003735	structural constituent of ribosome(GO:0003735)
0.4	14.2	GO:0050699	WW domain binding(GO:0050699)
0.5	13.6	GO:0005385	zinc ion transmembrane transporter activity(GO:0005385)
0.1	13.6	GO:0044822	mRNA binding(GO:0003729) poly(A) RNA binding(GO:0044822)
0.1	12.5	GO:0004722	protein serine/threonine phosphatase activity(GO:0004722)
1.4	12.4	GO:0033170	DNA clamp loader activity(GO:0003689) protein-DNA loading ATPase activity(GO:0033170)
0.5	11.7	GO:0008301	DNA binding, bending(GO:0008301)
0.4	11.3	GO:0017056	structural constituent of nuclear pore(GO:0017056)
0.3	11.1	GO:0015175	neutral amino acid transmembrane transporter activity(GO:0015175)
Showing 1 to 10 of 757 entries
Previous
1
2
3
4
5
…
76
Next
Gene overrepresentation in biological_process category:
Search:
Show 102550100 entries
Log-likelihood per target	Total log-likelihood	Term	Description
0.3	31.7	GO:0006614	SRP-dependent cotranslational protein targeting to membrane(GO:0006614)
0.3	25.9	GO:0070125	mitochondrial translational elongation(GO:0070125)
0.3	20.2	GO:0042255	ribosome assembly(GO:0042255)
0.5	18.2	GO:0031055	chromatin remodeling at centromere(GO:0031055)
0.4	15.3	GO:0006270	DNA replication initiation(GO:0006270)
0.3	14.6	GO:0051031	tRNA export from nucleus(GO:0006409) tRNA transport(GO:0051031) tRNA-containing ribonucleoprotein complex export from nucleus(GO:0071431)
1.4	13.5	GO:0086042	cardiac muscle cell-cardiac muscle cell adhesion(GO:0086042)
0.1	12.8	GO:0000398	RNA splicing, via transesterification reactions with bulged adenosine as nucleophile(GO:0000377) mRNA splicing, via spliceosome(GO:0000398)
0.3	12.0	GO:0006363	termination of RNA polymerase I transcription(GO:0006363)
1.7	11.9	GO:1900264	regulation of DNA-directed DNA polymerase activity(GO:1900262) positive regulation of DNA-directed DNA polymerase activity(GO:1900264)
Showing 1 to 10 of 1,367 entries
Previous
1
2
3
4
5
…
137
Next
Gene overrepresentation in cellular_component category:
Search:
Show 102550100 entries
Log-likelihood per target	Total log-likelihood	Term	Description
0.4	35.2	GO:0022625	cytosolic large ribosomal subunit(GO:0022625)
0.0	20.2	GO:0005730	nucleolus(GO:0005730)
0.3	18.6	GO:0022626	cytosolic ribosome(GO:0022626)
0.2	15.3	GO:0044391	ribosomal subunit(GO:0044391)
0.4	14.4	GO:0000791	euchromatin(GO:0000791)
0.5	13.8	GO:0000314	organellar small ribosomal subunit(GO:0000314) mitochondrial small ribosomal subunit(GO:0005763)
0.2	13.6	GO:0031903	peroxisomal membrane(GO:0005778) microbody membrane(GO:0031903)
0.4	11.3	GO:0016327	apicolateral plasma membrane(GO:0016327)
0.2	11.2	GO:0016328	lateral plasma membrane(GO:0016328)
0.2	11.1	GO:0005782	peroxisomal matrix(GO:0005782) microbody lumen(GO:0031907)
Showing 1 to 10 of 481 entries
Previous
1
2
3
4
5
…
49
Next
Gene overrepresentation in C2:CP:REACTOME category:
Search:
Show 102550100 entries
Log-likelihood per target	Total log-likelihood	Term	Description
0.2	65.9	REACTOME_GENERIC_TRANSCRIPTION_PATHWAY	b'Genes involved in Generic Transcription Pathway'
0.4	49.6	REACTOME_PEPTIDE_CHAIN_ELONGATION	b'Genes involved in Peptide chain elongation'
0.4	23.5	REACTOME_DEPOSITION_OF_NEW_CENPA_CONTAINING_NUCLEOSOMES_AT_THE_CENTROMERE	b'Genes involved in Deposition of New CENPA-containing Nucleosomes at the Centromere'
0.3	20.6	REACTOME_MITOCHONDRIAL_PROTEIN_IMPORT	b'Genes involved in Mitochondrial Protein Import'
0.4	18.0	REACTOME_AMINO_ACID_TRANSPORT_ACROSS_THE_PLASMA_MEMBRANE	b'Genes involved in Amino acid transport across the plasma membrane'
0.2	18.0	REACTOME_PROCESSING_OF_CAPPED_INTRON_CONTAINING_PRE_MRNA	b'Genes involved in Processing of Capped Intron-Containing Pre-mRNA'
0.4	17.8	REACTOME_DOWNREGULATION_OF_SMAD2_3_SMAD4_TRANSCRIPTIONAL_ACTIVITY	b'Genes involved in Downregulation of SMAD2/3:SMAD4 transcriptional activity'
0.2	17.2	REACTOME_MITOTIC_PROMETAPHASE	b'Genes involved in Mitotic Prometaphase'
0.4	16.8	REACTOME_GLYCOLYSIS	b'Genes involved in Glycolysis'
0.3	16.4	REACTOME_TRANSPORT_OF_MATURE_MRNA_DERIVED_FROM_AN_INTRONLESS_TRANSCRIPT	b'Genes involved in Transport of Mature mRNA Derived from an Intronless Transcript'
Showing 1 to 10 of 190 entries
Previous
1
2
3
4
5
…
19
Next

## Sheet: ZEB1
Top targets:
Search:
Show 102550100 entries
Promoter	Score	Transcript	Gene	Gene Info
chr17_-_7165662	5.34	ENST00000571881.2	CLDN7	claudin 7
		ENST00000360325.7
chr19_+_38755042	4.04	ENST00000301244.7	SPINT2	serine peptidase inhibitor, Kunitz type, 2
chr6_-_136871957	3.13	ENST00000354570.3	MAP7	microtubule-associated protein 7
chr19_+_38755203	3.01	ENST00000587090.1	SPINT2	serine peptidase inhibitor, Kunitz type, 2
		ENST00000454580.3
chr8_+_102504651	2.65	ENST00000251808.3	GRHL2	grainyhead-like 2 (Drosophila)
		ENST00000521085.1
chr2_-_166650700	2.59	ENST00000422973.1	GALNT3	UDP-N-acetyl-alpha-D-galactosamine:polypeptide N-acetylgalactosaminyltransferase 3 (GalNAc-T3)
chr19_-_12886327	2.54	ENST00000397668.3	HOOK2	hook microtubule-tethering protein 2
		ENST00000587178.1
		ENST00000264827.5
chr15_+_80351977	2.50	ENST00000559157.1	ZFAND6	zinc finger, AN1-type domain 6
		ENST00000561012.1
		ENST00000564367.1
		ENST00000558494.1
chr1_+_60280458	2.48	ENST00000455990.1	HOOK1	hook microtubule-tethering protein 1
		ENST00000371208.3
chr1_+_62208091	2.40	ENST00000316485.6	INADL	InaD-like (Drosophila)
		ENST00000371158.2
Showing 1 to 10 of 200 entries
Previous
1
2
3
4
5
…
20
Next
Gene Ontology Analysis
Gene overrepresentation in biological_process category:
Search:
Show 102550100 entries
Log-likelihood per target	Total log-likelihood	Term	Description
2.1	12.3	GO:0060671	epithelial cell differentiation involved in embryonic placenta development(GO:0060671) epithelial cell morphogenesis involved in placental branching(GO:0060672)
0.8	7.5	GO:0086042	cardiac muscle cell-cardiac muscle cell adhesion(GO:0086042)
0.5	7.0	GO:0060670	branching involved in labyrinthine layer morphogenesis(GO:0060670)
0.4	6.6	GO:0016338	calcium-independent cell-cell adhesion via plasma membrane cell-adhesion molecules(GO:0016338)
0.2	4.8	GO:0072662	protein targeting to peroxisome(GO:0006625) peroxisomal transport(GO:0043574) protein localization to peroxisome(GO:0072662) establishment of protein localization to peroxisome(GO:0072663)
0.1	4.7	GO:0098927	early endosome to late endosome transport(GO:0045022) vesicle-mediated transport between endosomal compartments(GO:0098927)
0.6	4.6	GO:0018242	protein O-linked glycosylation via serine(GO:0018242)
0.3	4.4	GO:0051599	response to hydrostatic pressure(GO:0051599)
0.2	4.4	GO:0034315	regulation of Arp2/3 complex-mediated actin nucleation(GO:0034315)
0.4	4.0	GO:0016554	cytidine to uridine editing(GO:0016554)
Showing 1 to 10 of 638 entries
Previous
1
2
3
4
5
…
64
Next
Gene overrepresentation in molecular_function category:
Search:
Show 102550100 entries
Log-likelihood per target	Total log-likelihood	Term	Description
0.2	13.4	GO:0004867	serine-type endopeptidase inhibitor activity(GO:0004867)
0.0	7.4	GO:0005198	structural molecule activity(GO:0005198)
0.2	6.1	GO:0070273	phosphatidylinositol-4-phosphate binding(GO:0070273)
0.7	5.6	GO:0086083	cell adhesive protein binding involved in bundle of His cell-Purkinje myocyte communication(GO:0086083)
0.1	4.9	GO:0051959	dynein light intermediate chain binding(GO:0051959)
0.0	4.8	GO:0044822	mRNA binding(GO:0003729) poly(A) RNA binding(GO:0044822)
0.2	4.7	GO:0004653	polypeptide N-acetylgalactosaminyltransferase activity(GO:0004653)
0.3	4.1	GO:0030215	semaphorin receptor binding(GO:0030215)
0.0	3.8	GO:0030276	clathrin binding(GO:0030276)
0.9	3.5	GO:0016309	1-phosphatidylinositol-5-phosphate 4-kinase activity(GO:0016309)
Showing 1 to 10 of 395 entries
Previous
1
2
3
4
5
…
40
Next
Gene overrepresentation in C2:CP category:
Search:
Show 102550100 entries
Log-likelihood per target	Total log-likelihood	Term	Description
0.0	5.7	NABA_ECM_AFFILIATED	b'Genes encoding proteins affiliated structurally or functionally to extracellular matrix proteins'
0.1	4.3	PID_CERAMIDE_PATHWAY	b'Ceramide signaling pathway'
0.1	4.1	PID_P38_ALPHA_BETA_DOWNSTREAM_PATHWAY	b'Signaling mediated by p38-alpha and p38-beta'
0.1	4.0	PID_LKB1_PATHWAY	b'LKB1 signaling events'
0.2	3.4	PID_ERBB_NETWORK_PATHWAY	b'ErbB receptor signaling network'
0.1	3.3	PID_S1P_S1P2_PATHWAY	b'S1P2 pathway'
0.1	2.7	PID_TCR_CALCIUM_PATHWAY	b'Calcium signaling in the CD4+ TCR pathway'
0.1	2.7	PID_FOXM1_PATHWAY	b'FOXM1 transcription factor network'
0.0	2.7	PID_TRKR_PATHWAY	b'Neurotrophic factor-mediated Trk receptor signaling'
0.0	2.7	PID_FGF_PATHWAY	b'FGF signaling pathway'
Showing 1 to 10 of 72 entries
Previous
1
2
3
4
5
…
8
Next
Gene overrepresentation in cellular_component category:
Search:
Show 102550100 entries
Log-likelihood per target	Total log-likelihood	Term	Description
0.4	9.6	GO:0016327	apicolateral plasma membrane(GO:0016327)
0.1	7.3	GO:0032580	Golgi cisterna membrane(GO:0032580)
0.3	7.2	GO:0001533	cornified envelope(GO:0001533)
0.1	6.3	GO:0016328	lateral plasma membrane(GO:0016328)
0.4	6.2	GO:0045095	keratin filament(GO:0045095)
0.1	6.2	GO:0005871	kinesin complex(GO:0005871)
0.0	5.5	GO:0070160	occluding junction(GO:0070160)
0.7	5.2	GO:0061689	tricellular tight junction(GO:0061689)
0.8	4.9	GO:0070695	FHF complex(GO:0070695)
0.0	3.8	GO:0032588	trans-Golgi network membrane(GO:0032588)
Showing 1 to 10 of 256 entries
Previous
1
2
3
4
5
…
26
Next
Gene overrepresentation in C2:CP:REACTOME category:
Search:
Show 102550100 entries
Log-likelihood per target	Total log-likelihood	Term	Description
0.4	12.1	REACTOME_TIGHT_JUNCTION_INTERACTIONS	b'Genes involved in Tight junction interactions'
0.5	9.0	REACTOME_APOPTOTIC_CLEAVAGE_OF_CELL_ADHESION_PROTEINS	b'Genes involved in Apoptotic cleavage of cell adhesion proteins'
0.1	6.0	REACTOME_O_LINKED_GLYCOSYLATION_OF_MUCINS	b'Genes involved in O-linked glycosylation of mucins'
0.2	4.9	REACTOME_DOWNREGULATION_OF_ERBB2_ERBB3_SIGNALING	b'Genes involved in Downregulation of ERBB2:ERBB3 signaling'
0.1	3.1	REACTOME_DOWNREGULATION_OF_SMAD2_3_SMAD4_TRANSCRIPTIONAL_ACTIVITY	b'Genes involved in Downregulation of SMAD2/3:SMAD4 transcriptional activity'
0.1	3.0	REACTOME_GLYCOLYSIS	b'Genes involved in Glycolysis'
0.1	2.6	REACTOME_CHOLESTEROL_BIOSYNTHESIS	b'Genes involved in Cholesterol biosynthesis'
0.1	2.6	REACTOME_CYTOSOLIC_TRNA_AMINOACYLATION	b'Genes involved in Cytosolic tRNA aminoacylation'
0.1	2.5	REACTOME_AMINO_ACID_SYNTHESIS_AND_INTERCONVERSION_TRANSAMINATION	b'Genes involved in Amino acid synthesis and interconversion (transamination)'
0.1	2.5	REACTOME_RNA_POL_I_TRANSCRIPTION_TERMINATION	b'Genes involved in RNA Polymerase I Transcription Termination'
Showing 1 to 10 of 118 entries
Previous
1
2
3
4
5
…
12
Next

## Sheet: E2F7
Top targets:
Search:
Show 102550100 entries
Promoter	Score	Transcript	Gene	Gene Info
chr19_+_10765614	2.94	ENST00000589283.1	ILF3	interleukin enhancer binding factor 3, 90kDa
chr8_+_48873453	2.91	ENST00000523944.1	MCM4	minichromosome maintenance complex component 4
chr1_+_60280458	2.72	ENST00000455990.1	HOOK1	hook microtubule-tethering protein 1
		ENST00000371208.3
chr15_+_51973708	2.65	ENST00000558709.1	SCG3	secretogranin III
chr13_+_34392200	2.34	ENST00000434425.1	RFC3	replication factor C (activator 1) 3, 38kDa
chr13_+_34392185	2.30	ENST00000380071.3	RFC3	replication factor C (activator 1) 3, 38kDa
chr15_+_51973680	2.25	ENST00000542355.2	SCG3	secretogranin III
chr9_-_23821273	2.17	ENST00000380110.4	ELAVL2	ELAV like neuron-specific RNA binding protein 2
chr3_-_186524234	2.13	ENST00000418288.1	RFC4	replication factor C (activator 1) 4, 37kDa
		ENST00000296273.2
chr15_+_51973550	2.06	ENST00000220478.3	SCG3	secretogranin III
Showing 1 to 10 of 200 entries
Previous
1
2
3
4
5
…
20
Next
Gene Ontology Analysis
Gene overrepresentation in C2:CP category:
Search:
Show 102550100 entries
Log-likelihood per target	Total log-likelihood	Term	Description
0.2	17.2	PID_FANCONI_PATHWAY	b'Fanconi anemia pathway'
0.1	7.9	PID_E2F_PATHWAY	b'E2F transcription factor network'
0.1	5.1	PID_RB_1PATHWAY	b'Regulation of retinoblastoma protein'
0.0	4.9	NABA_ECM_AFFILIATED	b'Genes encoding proteins affiliated structurally or functionally to extracellular matrix proteins'
0.1	4.3	PID_ATR_PATHWAY	b'ATR signaling pathway'
0.0	3.5	PID_TELOMERASE_PATHWAY	b'Regulation of Telomerase'
0.1	3.4	PID_NFAT_TFPATHWAY	b'Calcineurin-regulated NFAT-dependent transcription in lymphocytes'
0.0	3.2	PID_MYC_ACTIV_PATHWAY	b'Validated targets of C-MYC transcriptional activation'
0.1	2.9	PID_GLYPICAN_1PATHWAY	b'Glypican 1 network'
0.1	2.6	PID_BETA_CATENIN_DEG_PATHWAY	b'Degradation of beta catenin'
Showing 1 to 10 of 46 entries
Previous
1
2
3
4
5
Next
Gene overrepresentation in cellular_component category:
Search:
Show 102550100 entries
Log-likelihood per target	Total log-likelihood	Term	Description
0.0	11.4	GO:0005730	nucleolus(GO:0005730)
0.5	9.3	GO:0042555	MCM complex(GO:0042555)
1.0	7.7	GO:0005663	DNA replication factor C complex(GO:0005663)
0.2	5.8	GO:0070822	Sin3-type complex(GO:0070822)
0.5	3.8	GO:0005971	ribonucleoside-diphosphate reductase complex(GO:0005971)
0.7	3.6	GO:0032301	MutSalpha complex(GO:0032301)
0.4	3.5	GO:0043240	Fanconi anaemia nuclear complex(GO:0043240)
0.1	3.5	GO:0001533	cornified envelope(GO:0001533)
0.1	3.3	GO:0046658	anchored component of plasma membrane(GO:0046658)
0.0	3.3	GO:0005795	Golgi stack(GO:0005795)
Showing 1 to 10 of 233 entries
Previous
1
2
3
4
5
…
24
Next
Gene overrepresentation in biological_process category:
Search:
Show 102550100 entries
Log-likelihood per target	Total log-likelihood	Term	Description
1.1	7.8	GO:1900264	regulation of DNA-directed DNA polymerase activity(GO:1900262) positive regulation of DNA-directed DNA polymerase activity(GO:1900264)
0.6	7.3	GO:0006268	DNA unwinding involved in DNA replication(GO:0006268)
0.1	6.1	GO:0036297	interstrand cross-link repair(GO:0036297)
0.2	4.8	GO:0051290	protein heterotetramerization(GO:0051290)
0.2	4.6	GO:0000732	strand displacement(GO:0000732)
1.5	4.4	GO:0072180	mesonephric duct morphogenesis(GO:0072180)
0.4	4.0	GO:1902969	mitotic DNA replication(GO:1902969)
0.7	3.4	GO:0003165	Purkinje myocyte development(GO:0003165)
0.2	3.3	GO:0051315	attachment of mitotic spindle microtubules to kinetochore(GO:0051315)
0.0	3.3	GO:0002576	platelet degranulation(GO:0002576)
Showing 1 to 10 of 492 entries
Previous
1
2
3
4
5
…
50
Next
Gene overrepresentation in C2:CP:REACTOME category:
Search:
Show 102550100 entries
Log-likelihood per target	Total log-likelihood	Term	Description
0.6	10.6	REACTOME_POL_SWITCHING	b'Genes involved in Polymerase switching'
0.5	10.1	REACTOME_UNWINDING_OF_DNA	b'Genes involved in Unwinding of DNA'
0.3	7.0	REACTOME_G1_S_SPECIFIC_TRANSCRIPTION	b'Genes involved in G1/S-Specific Transcription'
0.2	5.7	REACTOME_FANCONI_ANEMIA_PATHWAY	b'Genes involved in Fanconi Anemia pathway'
0.1	5.2	REACTOME_REGULATION_OF_GLUCOKINASE_BY_GLUCOKINASE_REGULATORY_PROTEIN	b'Genes involved in Regulation of Glucokinase by Glucokinase Regulatory Protein'
0.1	5.2	REACTOME_DEPOSITION_OF_NEW_CENPA_CONTAINING_NUCLEOSOMES_AT_THE_CENTROMERE	b'Genes involved in Deposition of New CENPA-containing Nucleosomes at the Centromere'
0.1	4.9	REACTOME_MRNA_SPLICING	b'Genes involved in mRNA Splicing'
0.0	4.7	REACTOME_RESPONSE_TO_ELEVATED_PLATELET_CYTOSOLIC_CA2_	b'Genes involved in Response to elevated platelet cytosolic Ca2+'
0.2	4.3	REACTOME_APOPTOTIC_CLEAVAGE_OF_CELL_ADHESION_PROTEINS	b'Genes involved in Apoptotic cleavage of cell adhesion proteins'
0.2	4.3	REACTOME_HS_GAG_DEGRADATION	b'Genes involved in HS-GAG degradation'
Showing 1 to 10 of 103 entries
Previous
1
2
3
4
5
…
11
Next
Gene overrepresentation in molecular_function category:
Search:
Show 102550100 entries
Log-likelihood per target	Total log-likelihood	Term	Description
0.2	7.8	GO:0004003	ATP-dependent DNA helicase activity(GO:0004003)
0.8	7.6	GO:0003689	DNA clamp loader activity(GO:0003689) protein-DNA loading ATPase activity(GO:0033170)
0.0	6.8	GO:0044822	mRNA binding(GO:0003729) poly(A) RNA binding(GO:0044822)
0.0	5.5	GO:0061659	ubiquitin-like protein ligase activity(GO:0061659)
1.5	4.4	GO:0060422	peptidyl-dipeptidase inhibitor activity(GO:0060422)
0.0	3.9	GO:0004386	helicase activity(GO:0004386)
0.5	3.8	GO:0061731	ribonucleoside-diphosphate reductase activity, thioredoxin disulfide as acceptor(GO:0004748) oxidoreductase activity, acting on CH or CH2 groups(GO:0016725) oxidoreductase activity, acting on CH or CH2 groups, disulfide as acceptor(GO:0016728) ribonucleoside-diphosphate reductase activity(GO:0061731)
0.3	3.8	GO:0003910	DNA ligase activity(GO:0003909) DNA ligase (ATP) activity(GO:0003910)
0.7	3.6	GO:0032143	single thymine insertion binding(GO:0032143)
0.4	3.4	GO:0086083	cell adhesive protein binding involved in bundle of His cell-Purkinje myocyte communication(GO:0086083)
Showing 1 to 10 of 317 entries
Previous
1
2
3
4
5
…
32
Next

## Sheet: ETV5
Top targets:
Search:
Show 102550100 entries
Promoter	Score	Transcript	Gene	Gene Info
chr20_-_49575081	7.96	ENST00000371588.5	DPM1	dolichyl-phosphate mannosyltransferase polypeptide 1, catalytic subunit
		ENST00000371582.4
chr15_+_74833518	7.18	ENST00000346246.5	ARID3B	AT rich interactive domain 3B (BRIGHT-like)
chr18_+_33552597	5.97	ENST00000269194.6	C18orf21	chromosome 18 open reading frame 21
		ENST00000587873.1
chr5_+_158690089	5.74	ENST00000296786.6	UBLCP1	ubiquitin-like domain containing CTD phosphatase 1
chr11_-_64885111	5.73	ENST00000528598.1	ZNHIT2	zinc finger, HIT-type containing 2
		ENST00000310597.4
chr20_-_49575058	5.62	ENST00000371584.4	DPM1	dolichyl-phosphate mannosyltransferase polypeptide 1, catalytic subunit
		ENST00000371583.5
		ENST00000413082.1
chr3_-_57583185	5.54	ENST00000463880.1	ARF4	ADP-ribosylation factor 4
chr1_-_156698181	5.44	ENST00000313146.6	ISG20L2	interferon stimulated exonuclease gene 20kDa-like 2
chr3_-_28390415	5.01	ENST00000414162.1	AZI2	5-azacytidine induced 2
		ENST00000420543.2
chr11_-_118889323	4.90	ENST00000527673.1	RPS25	ribosomal protein S25
Showing 1 to 10 of 200 entries
Previous
1
2
3
4
5
…
20
Next
Gene Ontology Analysis
Gene overrepresentation in C2:CP:REACTOME category:
Search:
Show 102550100 entries
Log-likelihood per target	Total log-likelihood	Term	Description
0.4	52.3	REACTOME_PEPTIDE_CHAIN_ELONGATION	b'Genes involved in Peptide chain elongation'
0.1	25.6	REACTOME_GENERIC_TRANSCRIPTION_PATHWAY	b'Genes involved in Generic Transcription Pathway'
0.2	22.0	REACTOME_APC_C_CDH1_MEDIATED_DEGRADATION_OF_CDC20_AND_OTHER_APC_C_CDH1_TARGETED_PROTEINS_IN_LATE_MITOSIS_EARLY_G1	b'Genes involved in APC/C:Cdh1 mediated degradation of Cdc20 and other APC/C:Cdh1 targeted proteins in late mitosis/early G1'
0.2	19.7	REACTOME_PROCESSING_OF_CAPPED_INTRON_CONTAINING_PRE_MRNA	b'Genes involved in Processing of Capped Intron-Containing Pre-mRNA'
0.1	14.0	REACTOME_MITOTIC_PROMETAPHASE	b'Genes involved in Mitotic Prometaphase'
1.0	13.8	REACTOME_SYNTHESIS_OF_SUBSTRATES_IN_N_GLYCAN_BIOSYTHESIS	b'Genes involved in Synthesis of substrates in N-glycan biosythesis'
0.3	13.3	REACTOME_3_UTR_MEDIATED_TRANSLATIONAL_REGULATION	b"Genes involved in 3' -UTR-mediated translational regulation"
0.3	12.2	REACTOME_ABORTIVE_ELONGATION_OF_HIV1_TRANSCRIPT_IN_THE_ABSENCE_OF_TAT	b'Genes involved in Abortive elongation of HIV-1 transcript in the absence of Tat'
0.3	12.1	REACTOME_ACTIVATION_OF_THE_PRE_REPLICATIVE_COMPLEX	b'Genes involved in Activation of the pre-replicative complex'
0.3	11.4	REACTOME_PREFOLDIN_MEDIATED_TRANSFER_OF_SUBSTRATE_TO_CCT_TRIC	b'Genes involved in Prefoldin mediated transfer of substrate to CCT/TriC'
Showing 1 to 10 of 146 entries
Previous
1
2
3
4
5
…
15
Next
Gene overrepresentation in cellular_component category:
Search:
Show 102550100 entries
Log-likelihood per target	Total log-likelihood	Term	Description
0.4	37.0	GO:0022625	cytosolic large ribosomal subunit(GO:0022625)
0.3	21.8	GO:0022627	cytosolic small ribosomal subunit(GO:0022627)
0.0	15.2	GO:0005730	nucleolus(GO:0005730)
0.2	14.9	GO:0000315	organellar large ribosomal subunit(GO:0000315) mitochondrial large ribosomal subunit(GO:0005762)
3.5	13.9	GO:0031501	mannosyltransferase complex(GO:0031501)
0.4	13.2	GO:0030687	preribosome, large subunit precursor(GO:0030687)
0.2	12.8	GO:0042645	nucleoid(GO:0009295) mitochondrial nucleoid(GO:0042645)
0.9	10.1	GO:0000445	THO complex(GO:0000347) THO complex part of transcription export complex(GO:0000445)
0.4	9.4	GO:0005736	DNA-directed RNA polymerase I complex(GO:0005736)
1.3	9.2	GO:0005854	nascent polypeptide-associated complex(GO:0005854)
Showing 1 to 10 of 386 entries
Previous
1
2
3
4
5
…
39
Next
Gene overrepresentation in molecular_function category:
Search:
Show 102550100 entries
Log-likelihood per target	Total log-likelihood	Term	Description
0.0	84.3	GO:0003676	nucleic acid binding(GO:0003676)
0.3	61.1	GO:0003735	structural constituent of ribosome(GO:0003735)
0.0	48.7	GO:0003723	RNA binding(GO:0003723)
0.3	16.3	GO:0004532	exoribonuclease activity(GO:0004532)
0.2	15.2	GO:0003743	translation initiation factor activity(GO:0003743)
2.2	13.2	GO:0004169	dolichyl-phosphate-mannose-protein mannosyltransferase activity(GO:0004169)
0.1	12.6	GO:0004722	protein serine/threonine phosphatase activity(GO:0004722)
0.2	12.5	GO:0004867	serine-type endopeptidase inhibitor activity(GO:0004867)
0.1	10.7	GO:0044822	mRNA binding(GO:0003729) poly(A) RNA binding(GO:0044822)
0.1	10.3	GO:0051082	unfolded protein binding(GO:0051082)
Showing 1 to 10 of 533 entries
Previous
1
2
3
4
5
…
54
Next
Gene overrepresentation in biological_process category:
Search:
Show 102550100 entries
Log-likelihood per target	Total log-likelihood	Term	Description
0.3	33.6	GO:0006614	SRP-dependent cotranslational protein targeting to membrane(GO:0006614)
0.1	25.4	GO:0000377	RNA splicing, via transesterification reactions with bulged adenosine as nucleophile(GO:0000377) mRNA splicing, via spliceosome(GO:0000398)
0.4	21.8	GO:0042273	ribosomal large subunit biogenesis(GO:0042273)
0.8	16.4	GO:0060670	branching involved in labyrinthine layer morphogenesis(GO:0060670)
1.6	15.7	GO:2000002	negative regulation of DNA damage checkpoint(GO:2000002)
0.3	14.8	GO:0006363	termination of RNA polymerase I transcription(GO:0006363)
0.5	14.7	GO:0000027	ribosomal large subunit assembly(GO:0000027)
2.4	14.2	GO:0044565	dendritic cell proliferation(GO:0044565)
2.3	13.6	GO:0019348	dolichol metabolic process(GO:0019348)
0.1	11.6	GO:0070125	mitochondrial translational elongation(GO:0070125)
Showing 1 to 10 of 940 entries
Previous
1
2
3
4
5
…
94
Next
Gene overrepresentation in C2:CP category:
Search:
Show 102550100 entries
Log-likelihood per target	Total log-likelihood	Term	Description
0.2	18.7	PID_PLK1_PATHWAY	b'PLK1 signaling events'
0.2	17.0	PID_FANCONI_PATHWAY	b'Fanconi anemia pathway'
0.1	15.1	PID_MYC_ACTIV_PATHWAY	b'Validated targets of C-MYC transcriptional activation'
0.3	9.3	PID_BARD1_PATHWAY	b'BARD1 signaling events'
0.1	6.0	PID_AURORA_B_PATHWAY	b'Aurora B signaling'
0.1	5.3	PID_REG_GR_PATHWAY	b'Glucocorticoid receptor regulatory network'
0.1	3.6	PID_DELTA_NP63_PATHWAY	b'Validated transcriptional targets of deltaNp63 isoforms'
0.2	3.1	PID_TCR_JNK_PATHWAY	b'JNK signaling in the CD4+ TCR pathway'
0.1	2.8	PID_TOLL_ENDOGENOUS_PATHWAY	b'Endogenous TLR signaling'
0.1	2.6	PID_FRA_PATHWAY	b'Validated transcriptional targets of AP1 family members Fra1 and Fra2'
Showing 1 to 10 of 70 entries
Previous
1
2
3
4
5
6
7
Next

## Sheet: CEBPZ
Top targets:
Search:
Show 102550100 entries
Promoter	Score	Transcript	Gene	Gene Info
chr17_-_57232525	6.70	ENST00000583380.1	SKA2	spindle and kinetochore associated complex subunit 2
		ENST00000580541.1
		ENST00000578105.1
		ENST00000437036.2
chr3_-_185826855	5.17	ENST00000306376.5	ETV5	ets variant 5
chr17_+_57232690	4.69	ENST00000262293.4	PRR11	proline rich 11
chr17_+_26646121	4.46	ENST00000226230.6	TMEM97	transmembrane protein 97
chr9_+_131843377	4.24	ENST00000372546.4	DOLPP1	dolichyldiphosphatase 1
		ENST00000406974.3
		ENST00000540102.1
chr17_+_57233087	3.73	ENST00000578777.1	PRR11	proline rich 11
		ENST00000577457.1
		ENST00000582995.1
chr14_+_24641062	3.62	ENST00000311457.3	REC8	REC8 meiotic recombination protein
		ENST00000557806.1
		ENST00000559919.1
chr14_+_54863682	3.52	ENST00000543789.2	CDKN3	cyclin-dependent kinase inhibitor 3
		ENST00000442975.2
		ENST00000458126.2
		ENST00000556102.2
chr1_-_150669604	3.27	ENST00000427665.1	GOLPH3L	golgi phosphoprotein 3-like
		ENST00000540514.1
chr8_+_11660227	3.22	ENST00000443614.2	FDFT1	farnesyl-diphosphate farnesyltransferase 1
		ENST00000525900.1
Showing 1 to 10 of 200 entries
Previous
1
2
3
4
5
…
20
Next
Gene Ontology Analysis
Gene overrepresentation in molecular_function category:
Search:
Show 102550100 entries
Log-likelihood per target	Total log-likelihood	Term	Description
0.2	8.8	GO:0008138	protein tyrosine/serine/threonine phosphatase activity(GO:0008138)
0.2	7.3	GO:0004003	ATP-dependent DNA helicase activity(GO:0004003)
0.2	6.4	GO:0050699	WW domain binding(GO:0050699)
0.2	6.2	GO:0070273	phosphatidylinositol-4-phosphate binding(GO:0070273)
0.0	6.2	GO:0003735	structural constituent of ribosome(GO:0003735)
0.0	5.6	GO:0042393	histone binding(GO:0042393)
0.0	5.5	GO:0005089	Rho guanyl-nucleotide exchange factor activity(GO:0005089)
0.0	5.4	GO:0015631	tubulin binding(GO:0015631)
0.1	5.2	GO:0061650	ubiquitin-like protein conjugating enzyme activity(GO:0061650)
0.3	5.0	GO:0043138	3'-5' DNA helicase activity(GO:0043138)
Showing 1 to 10 of 388 entries
Previous
1
2
3
4
5
…
39
Next
Gene overrepresentation in C2:CP:REACTOME category:
Search:
Show 102550100 entries
Log-likelihood per target	Total log-likelihood	Term	Description
0.2	19.8	REACTOME_MITOTIC_PROMETAPHASE	b'Genes involved in Mitotic Prometaphase'
0.4	16.6	REACTOME_PACKAGING_OF_TELOMERE_ENDS	b'Genes involved in Packaging Of Telomere Ends'
0.6	14.8	REACTOME_CYCLIN_A_B1_ASSOCIATED_EVENTS_DURING_G2_M_TRANSITION	b'Genes involved in Cyclin A/B1 associated events during G2/M transition'
0.4	12.8	REACTOME_CHOLESTEROL_BIOSYNTHESIS	b'Genes involved in Cholesterol biosynthesis'
0.4	8.7	REACTOME_UNWINDING_OF_DNA	b'Genes involved in Unwinding of DNA'
0.1	8.3	REACTOME_NRAGE_SIGNALS_DEATH_THROUGH_JNK	b'Genes involved in NRAGE signals death through JNK'
0.2	7.4	REACTOME_DEPOSITION_OF_NEW_CENPA_CONTAINING_NUCLEOSOMES_AT_THE_CENTROMERE	b'Genes involved in Deposition of New CENPA-containing Nucleosomes at the Centromere'
0.2	7.4	REACTOME_KINESINS	b'Genes involved in Kinesins'
0.3	6.7	REACTOME_SYNTHESIS_OF_VERY_LONG_CHAIN_FATTY_ACYL_COAS	b'Genes involved in Synthesis of very long-chain fatty acyl-CoAs'
0.3	6.7	REACTOME_RNA_POL_I_PROMOTER_OPENING	b'Genes involved in RNA Polymerase I Promoter Opening'
Showing 1 to 10 of 112 entries
Previous
1
2
3
4
5
…
12
Next
Gene overrepresentation in C2:CP category:
Search:
Show 102550100 entries
Log-likelihood per target	Total log-likelihood	Term	Description
0.4	22.5	PID_FOXM1_PATHWAY	b'FOXM1 transcription factor network'
0.3	21.4	PID_PLK1_PATHWAY	b'PLK1 signaling events'
0.2	9.9	PID_FANCONI_PATHWAY	b'Fanconi anemia pathway'
0.2	5.7	PID_BARD1_PATHWAY	b'BARD1 signaling events'
0.1	5.2	PID_AURORA_B_PATHWAY	b'Aurora B signaling'
0.1	5.2	PID_P73PATHWAY	b'p73 transcription factor network'
0.1	4.8	SIG_CD40PATHWAYMAP	b'Genes related to CD40 signaling'
0.1	3.6	PID_NECTIN_PATHWAY	b'Nectin adhesion pathway'
0.0	3.5	NABA_ECM_AFFILIATED	b'Genes encoding proteins affiliated structurally or functionally to extracellular matrix proteins'
0.0	3.4	PID_CMYB_PATHWAY	b'C-MYB transcription factor network'
Showing 1 to 10 of 69 entries
Previous
1
2
3
4
5
6
7
Next
Gene overrepresentation in biological_process category:
Search:
Show 102550100 entries
Log-likelihood per target	Total log-likelihood	Term	Description
0.1	8.2	GO:0031110	regulation of microtubule polymerization or depolymerization(GO:0031110)
0.3	7.8	GO:0006625	protein targeting to peroxisome(GO:0006625) peroxisomal transport(GO:0043574) protein localization to peroxisome(GO:0072662) establishment of protein localization to peroxisome(GO:0072663)
1.1	7.4	GO:0016129	phytosteroid metabolic process(GO:0016128) phytosteroid biosynthetic process(GO:0016129)
0.7	6.4	GO:0046465	dolichyl diphosphate biosynthetic process(GO:0006489) dolichyl diphosphate metabolic process(GO:0046465)
0.3	6.0	GO:0060716	labyrinthine layer blood vessel development(GO:0060716)
0.3	5.9	GO:0051382	kinetochore assembly(GO:0051382)
0.1	5.6	GO:0035335	peptidyl-tyrosine dephosphorylation(GO:0035335)
1.1	5.4	GO:0042078	germ-line stem cell division(GO:0042078) male germ-line stem cell asymmetric division(GO:0048133) germline stem cell asymmetric division(GO:0098728)
0.1	5.4	GO:0042632	cholesterol homeostasis(GO:0042632) sterol homeostasis(GO:0055092)
0.1	5.3	GO:0006342	chromatin silencing(GO:0006342)
Showing 1 to 10 of 597 entries
Previous
1
2
3
4
5
…
60
Next
Gene overrepresentation in cellular_component category:
Search:
Show 102550100 entries
Log-likelihood per target	Total log-likelihood	Term	Description
0.3	16.7	GO:0000786	nucleosome(GO:0000786)
0.1	10.9	GO:0005791	rough endoplasmic reticulum(GO:0005791)
0.9	9.6	GO:0000940	condensed chromosome outer kinetochore(GO:0000940)
0.1	6.0	GO:0005778	peroxisomal membrane(GO:0005778) microbody membrane(GO:0031903)
1.2	5.8	GO:0097125	cyclin B1-CDK1 complex(GO:0097125)
0.9	5.3	GO:0097149	centralspindlin complex(GO:0097149)
0.1	5.1	GO:0032588	trans-Golgi network membrane(GO:0032588)
0.3	5.0	GO:0042555	MCM complex(GO:0042555)
0.0	4.5	GO:0000777	condensed chromosome kinetochore(GO:0000777)
0.1	4.2	GO:0005871	kinesin complex(GO:0005871)
Showing 1 to 10 of 255 entries
Previous
1
2
3
4
5
…
26
Next

## Sheet: MYCN
Top targets:
Search:
Show 102550100 entries
Promoter	Score	Transcript	Gene	Gene Info
chr2_-_198364581	6.59	ENST00000428204.1	HSPD1	heat shock 60kDa protein 1 (chaperonin)
chr3_+_99536663	5.18	ENST00000421999.2	CMSS1	cms1 ribosomal small subunit homolog (yeast)
		ENST00000463526.1
chr19_-_10764509	4.86	ENST00000591501.1	ILF3-AS1	ILF3 antisense RNA 1 (head to head)
chr10_-_126849626	4.79	ENST00000530884.1	CTBP2	C-terminal binding protein 2
chr4_+_57301896	4.65	ENST00000514888.1	PAICS	phosphoribosylaminoimidazole carboxylase, phosphoribosylaminoimidazole succinocarboxamide synthetase
		ENST00000264221.2
		ENST00000505164.1
chr4_+_119199864	4.39	ENST00000602414.1	SNHG8	small nucleolar RNA host gene 8 (non-protein coding)
		ENST00000602520.1
chr19_+_10765003	3.80	ENST00000407004.3	ILF3	interleukin enhancer binding factor 3, 90kDa
		ENST00000589998.1
		ENST00000589600.1
chr1_+_45792541	3.79	ENST00000334815.3	HPDL	4-hydroxyphenylpyruvate dioxygenase-like
chr17_+_7477040	3.74	ENST00000581384.1	EIF4A1	eukaryotic translation initiation factor 4A1
		ENST00000577929.1
chr16_-_81129845	3.66	ENST00000569885.1	GCSH	glycine cleavage system protein H (aminomethyl carrier)
		ENST00000566566.1
Showing 1 to 10 of 200 entries
Previous
1
2
3
4
5
…
20
Next
Gene Ontology Analysis
Gene overrepresentation in C2:CP category:
Search:
Show 102550100 entries
Log-likelihood per target	Total log-likelihood	Term	Description
0.2	32.8	PID_MYC_ACTIV_PATHWAY	b'Validated targets of C-MYC transcriptional activation'
0.1	12.3	PID_P73PATHWAY	b'p73 transcription factor network'
0.4	9.9	PID_TOLL_ENDOGENOUS_PATHWAY	b'Endogenous TLR signaling'
0.1	8.8	WNT_SIGNALING	b'Genes related to Wnt-mediated signal transduction'
0.1	7.2	PID_PLK1_PATHWAY	b'PLK1 signaling events'
0.1	5.0	PID_TELOMERASE_PATHWAY	b'Regulation of Telomerase'
0.3	4.6	SA_REG_CASCADE_OF_CYCLIN_EXPR	b'Expression of cyclins regulates progression through the cell cycle by activating cyclin-dependent kinases.'
0.1	3.9	ST_FAS_SIGNALING_PATHWAY	b'Fas Signaling Pathway'
0.1	2.7	PID_ATR_PATHWAY	b'ATR signaling pathway'
0.1	2.6	PID_P38_MK2_PATHWAY	b'p38 signaling mediated by MAPKAP kinases'
Showing 1 to 10 of 77 entries
Previous
1
2
3
4
5
…
8
Next
Gene overrepresentation in C2:CP:REACTOME category:
Search:
Show 102550100 entries
Log-likelihood per target	Total log-likelihood	Term	Description
0.3	20.3	REACTOME_MITOCHONDRIAL_PROTEIN_IMPORT	b'Genes involved in Mitochondrial Protein Import'
0.8	16.8	REACTOME_PURINE_RIBONUCLEOSIDE_MONOPHOSPHATE_BIOSYNTHESIS	b'Genes involved in Purine ribonucleoside monophosphate biosynthesis'
0.2	15.8	REACTOME_METABOLISM_OF_NON_CODING_RNA	b'Genes involved in Metabolism of non-coding RNA'
0.3	13.9	REACTOME_DEADENYLATION_OF_MRNA	b'Genes involved in Deadenylation of mRNA'
0.3	13.7	REACTOME_AMINO_ACID_TRANSPORT_ACROSS_THE_PLASMA_MEMBRANE	b'Genes involved in Amino acid transport across the plasma membrane'
0.1	12.1	REACTOME_PROCESSING_OF_CAPPED_INTRON_CONTAINING_PRE_MRNA	b'Genes involved in Processing of Capped Intron-Containing Pre-mRNA'
0.1	10.8	REACTOME_3_UTR_MEDIATED_TRANSLATIONAL_REGULATION	b"Genes involved in 3' -UTR-mediated translational regulation"
0.1	9.6	REACTOME_ACTIVATION_OF_THE_MRNA_UPON_BINDING_OF_THE_CAP_BINDING_COMPLEX_AND_EIFS_AND_SUBSEQUENT_BINDING_TO_43S	b'Genes involved in Activation of the mRNA upon binding of the cap-binding complex and eIFs, and subsequent binding to 43S'
0.7	8.6	REACTOME_RESOLUTION_OF_AP_SITES_VIA_THE_SINGLE_NUCLEOTIDE_REPLACEMENT_PATHWAY	b'Genes involved in Resolution of AP sites via the single-nucleotide replacement pathway'
0.2	8.6	REACTOME_CYTOSOLIC_TRNA_AMINOACYLATION	b'Genes involved in Cytosolic tRNA aminoacylation'
Showing 1 to 10 of 138 entries
Previous
1
2
3
4
5
…
14
Next
Gene overrepresentation in biological_process category:
Search:
Show 102550100 entries
Log-likelihood per target	Total log-likelihood	Term	Description
1.3	15.6	GO:0006189	'de novo' IMP biosynthetic process(GO:0006189)
3.5	10.4	GO:0045041	protein import into mitochondrial intermembrane space(GO:0045041)
0.2	9.4	GO:0000289	nuclear-transcribed mRNA poly(A) tail shortening(GO:0000289)
0.1	8.8	GO:0042771	intrinsic apoptotic signaling pathway in response to DNA damage by p53 class mediator(GO:0042771)
0.1	8.7	GO:0070125	mitochondrial translational elongation(GO:0070125)
1.6	7.8	GO:0019464	glycine catabolic process(GO:0006546) glycine decarboxylation via glycine cleavage system(GO:0019464)
0.5	6.9	GO:0071578	zinc II ion transmembrane import(GO:0071578)
0.0	6.9	GO:0007156	homophilic cell adhesion via plasma membrane adhesion molecules(GO:0007156)
0.1	5.8	GO:0051031	tRNA transport(GO:0051031)
0.2	5.6	GO:0035774	positive regulation of insulin secretion involved in cellular response to glucose stimulus(GO:0035774)
Showing 1 to 10 of 732 entries
Previous
1
2
3
4
5
…
74
Next
Gene overrepresentation in molecular_function category:
Search:
Show 102550100 entries
Log-likelihood per target	Total log-likelihood	Term	Description
0.1	21.1	GO:0003735	structural constituent of ribosome(GO:0003735)
0.0	18.8	GO:0003723	RNA binding(GO:0003723)
0.2	11.1	GO:0034062	RNA polymerase activity(GO:0034062)
0.3	11.0	GO:0000339	RNA cap binding(GO:0000339)
1.9	9.5	GO:0034186	apolipoprotein A-I binding(GO:0034186)
0.3	8.2	GO:0016881	acid-amino acid ligase activity(GO:0016881)
1.7	6.9	GO:0004047	aminomethyltransferase activity(GO:0004047)
0.0	6.7	GO:0005509	calcium ion binding(GO:0005509)
0.4	6.3	GO:0009982	pseudouridine synthase activity(GO:0009982)
0.9	6.2	GO:0019238	cyclohydrolase activity(GO:0019238)
Showing 1 to 10 of 498 entries
Previous
1
2
3
4
5
…
50
Next
Gene overrepresentation in cellular_component category:
Search:
Show 102550100 entries
Log-likelihood per target	Total log-likelihood	Term	Description
0.0	27.9	GO:0005730	nucleolus(GO:0005730)
0.0	16.7	GO:0005887	integral component of plasma membrane(GO:0005887)
0.5	13.2	GO:0016281	eukaryotic translation initiation factor 4F complex(GO:0016281)
2.0	10.1	GO:0046696	lipopolysaccharide receptor complex(GO:0046696)
0.1	9.5	GO:0022625	cytosolic large ribosomal subunit(GO:0022625)
2.6	7.8	GO:0005960	glycine cleavage complex(GO:0005960)
0.2	6.6	GO:0030686	90S preribosome(GO:0030686)
0.1	6.4	GO:0005643	nuclear pore(GO:0005643)
0.2	6.2	GO:0005666	DNA-directed RNA polymerase III complex(GO:0005666)
0.2	6.0	GO:0016580	Sin3 complex(GO:0016580)
Showing 1 to 10 of 307 entries
Previous
1
2
3
4
5
…
31
Next
